# Supplementary material for: Serial femtosecond crystallography on in vivo-grown crystals drives elucidation of mosquitocidal Cyt1Aa bioactivation cascade
Source: PubMed Central journal article supplement (PMC7052140; doi:10.1038/s41467-020-14894-w), 2020-03-02
Supplement: 41467_2020_14894_MOESM1_ESM.pdf [file 41467_2020_14894_MOESM1_ESM.pdf]

Supplementary Information

**Serial femtosecond crystallography on *in vivo*-grown crystals drives elucidation of mosquitocidal Cyt1Aa bioactivation cascade**

Guillaume Tetreau, Anne-Sophie Banneville, Elena A. Andreeva, Aaron S. Brewster, *et al.*

**This PDF file contains:**

- Supplementary Note 1
- Supplementary Figures 1-16
- Supplementary Tables 1-4

## Supplementary Note 1

### A difference-density based mutation strategy

The  $\text{Fo}^{\text{DTT}}\text{-Fo}^{\text{pH7}}$  map indicates that soaking with DTT results in rupture of the disulfide bridge (strong negative peak on the C7-S $\gamma$ -S $\gamma$ -C7 bond) and, consequently, in a relaxation of the N-terminal propeptide resulting in an expansion at crystal packing interface #3 where the N-terminal propeptide (notably D11), the C-terminal end of  $\beta_6$ , and the N-terminal ends of  $\beta_5$  (notably Q168) and  $\beta_7$  interact (Fig. 2 and Supplementary Fig. 3 and Supplementary Table 1). Marked by a positive peak between D11 and Q168, this expansion seemingly impacts the hydrophobic core of the protein, with negative peaks observed on the aromatic side chains of F147, Y171 and Y173. Refinement of the 'DTT' structure confirms that DTT has no further effect on the protoxin structure at pH 7 (Fig. 2b and Supplementary Figs. 2 and 4).

Features in the  $\text{Fo}^{\text{pH10}}\text{-Fo}^{\text{pH7}}$  map differ, with strong positive and negative peaks at the DS interface and no peaks on disulfide bridge atoms (Fig. 2b and Supplementary Fig. 4). A positive peak is again seen between D11 and Q168 at crystal packing interface #3, reminiscent of the observation made in the  $\text{Fo}^{\text{DTT}}\text{-Fo}^{\text{pH7}}$  map. Refinement of the 'pH10' structure confirms changes in interactions at the DS interface (Fig. 2 and Supplementary Figs. 2 and 4), with loss of the bifurcated intermolecular H-bond between the side chains of E32 ( $\beta_1$ - $\beta_2$  loop) and E45 ( $\beta_2$ - $\alpha_A$  loop) from facing monomers, and of the intramolecular H-bond tethering the  $\alpha_C/\alpha_D$  region (Q138) to the tip of  $\beta_2$  (E45). As a result, in each monomer, strands  $\beta_1$ ,  $\beta_2$  and the C-terminal propeptide draw away from strand  $\beta_3$ , at the opposite end of the  $\beta$ -sheet, but also from the  $\alpha_C$ ,  $\alpha_D$  and  $\alpha_E$  helices, which together cover the hydrophobic face of the  $\beta$ -sheet (Supplementary Fig. 2). To the contrary, the  $\alpha_A/\alpha_B$  face of the  $\beta$ -sheet is not affected by pH elevation, in line with  $\text{Fo}^{\text{pH10}}\text{-Fo}^{\text{pH7}}$  map observations.

We challenged by mutagenesis the role of residues pinpointed by the strongest peaks in the  $\text{Fo}^{\text{DTT}}\text{-Fo}^{\text{pH7}}$  and  $\text{Fo}^{\text{pH10}}\text{-Fo}^{\text{pH7}}$  maps, hypothesizing that they would be central to crystal formation and dissolution, and possibly function (Fig. 3). We first probed the role of disulfide-bridge chaining by expressing a C7S mutant. The C7S crystals are spherical and significantly smaller than the WT crystals, but they are produced at a similar yield and diffract to a similar resolution (2.0 vs. 1.85 Å, respectively, for similarly sized datasets), revealing a structure nearly indiscernible from the 'DTT' structure (Table 1, Figs. 2b and 3 and Supplementary Figs. 2 and 4). Thus, cysteine chaining of WT Cyt1Aa monomers is nonessential for the production of diffraction-grade crystals and could occur after *in vivo* crystallization has completed in *Bti* cells. As a control for the unicity of the role of C7, we also mutated the second cysteine of Cyt1Aa, viz. C190, introducing a C190V mutation with the aim to not interfere with the hydrophobic environment present at the  $\alpha_C/\alpha_D$  interface with the  $\beta$ -sheet (Fig. 1e and Supplementary Fig. 2). C190V crystals are significantly smaller than the WT but production

yields are not affected, suggesting a minor impact of the mutation on protoxin folding and *in vivo* crystallization (Fig. 3).

E32 and E45 were identified as the cornerstone residues controlling the pH sensitivity of the DS interface (Fig. 2b). With the aim of rendering pH-insensitive the H-bonds that these residues contribute at the DS interface, we mutated both residues into glutamines (E32Q, E45Q). The E45Q mutation was also intended to strengthen the tether between the  $\alpha$ C/ $\alpha$ D region (Q138) and the  $\beta$ -sheet, allowing us to test the hypothesis that opening of this interface is involved in function. E45Q crystals are significantly larger than the WT crystals, while E32Q crystals are produced in higher abundance (Fig. 3). Thus, both mutations, intended to stabilize the DS interface, positively impact crystal growth, albeit in a different fashion.

Our observation that interface 3 changes structurally in response to reducing agent and pH prompted us to test the role of D11 and Q168 in conferring these sensitivities. A D11N mutation was introduced to decrease the pH sensitivity of this interface, and a reverse Q168E mutation to increase it. Crystals of D11N are significantly larger and quasi-cylindrical in shape, evincing that the mutation favours crystal growth (Fig. 3). Crystals of Q168E are marquis-shaped and produced in reduced amounts (Fig. 3), highlighting the negative effect of the mutation on *in vivo* crystallization; the side chain nitrogen of Q168 is indeed involved in two H-bonds with acidic oxygen atoms at interface #3 (Fig. 2B and Supplementary Figs. 2, 3b,c and 4). Last, we introduced a Y171F mutation, attempting to verify whether the pH-sensitive H-bond between the  $\beta$ 5 residue hydroxyl and T146(O) (pK<sub>r</sub> of tyrosine is 10.5) at the tip of  $\alpha$ D plays a role in protein folding or alkaline activation. Indeed, packing relaxation at interface #3 was evident as disorder on the hydrophobic  $\alpha$ C/ $\alpha$ D face of the  $\beta$ -sheet (Fig. 2b). Both the production yield and the crystal size are negatively impacted (Fig. 3), suggesting that this H-bond plays an important role before crystallization – possibly during folding.

Supplementary Figures 1-16:

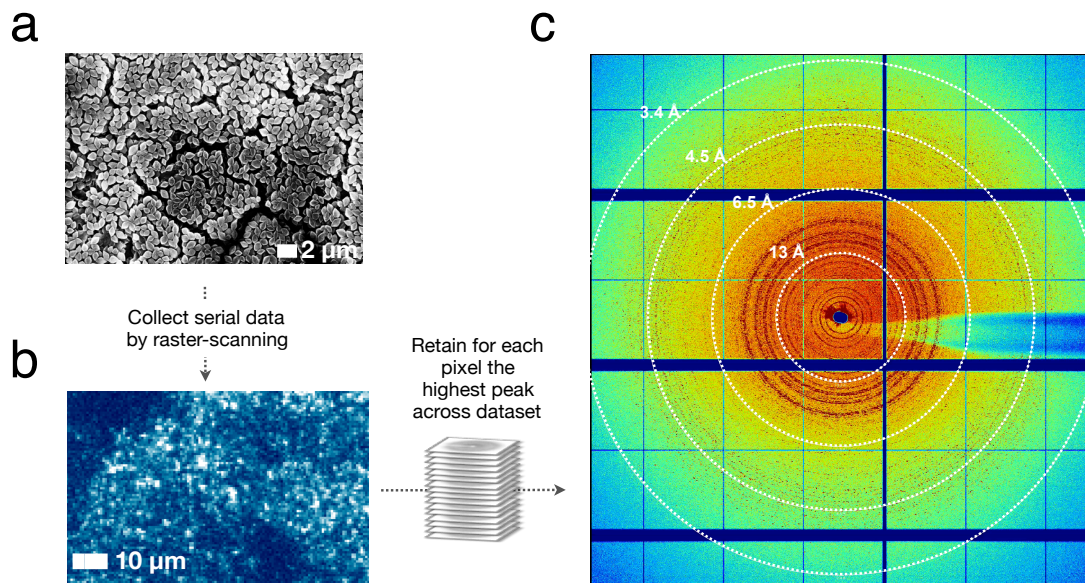

**Supplementary Fig. 1. Serial synchrotron crystallography allowed assessing diffraction quality prior to XFEL experiments.** **a**, Cyt1Aa nanocrystals were deposited between two silicon wafers and flash-cooled in a gaseous nitrogen stream at 100 K. **b**, Diffraction data were collected serially by raster-scanning with a sub-micron X-ray beam (0.7 μm FWHM), with 80 ms exposure per pattern and 10 μm horizontal and vertical spacing between X-ray shots. In this panel, each pixel represents a diffraction pattern, with the colouring intensity scaling to the summed intensity of Bragg peaks. The figure offers a X-ray microscopic image of the sandwiched crystal suspension presented to the X-ray beam. **c**, Powder rings extend to 4.0 Å resolution on the maximum projection of ~1 million diffraction patterns collected at 100 K using raster-scanning serial synchrotron crystallography at the (sub)-microfocus ESRF-ID13 beamline.

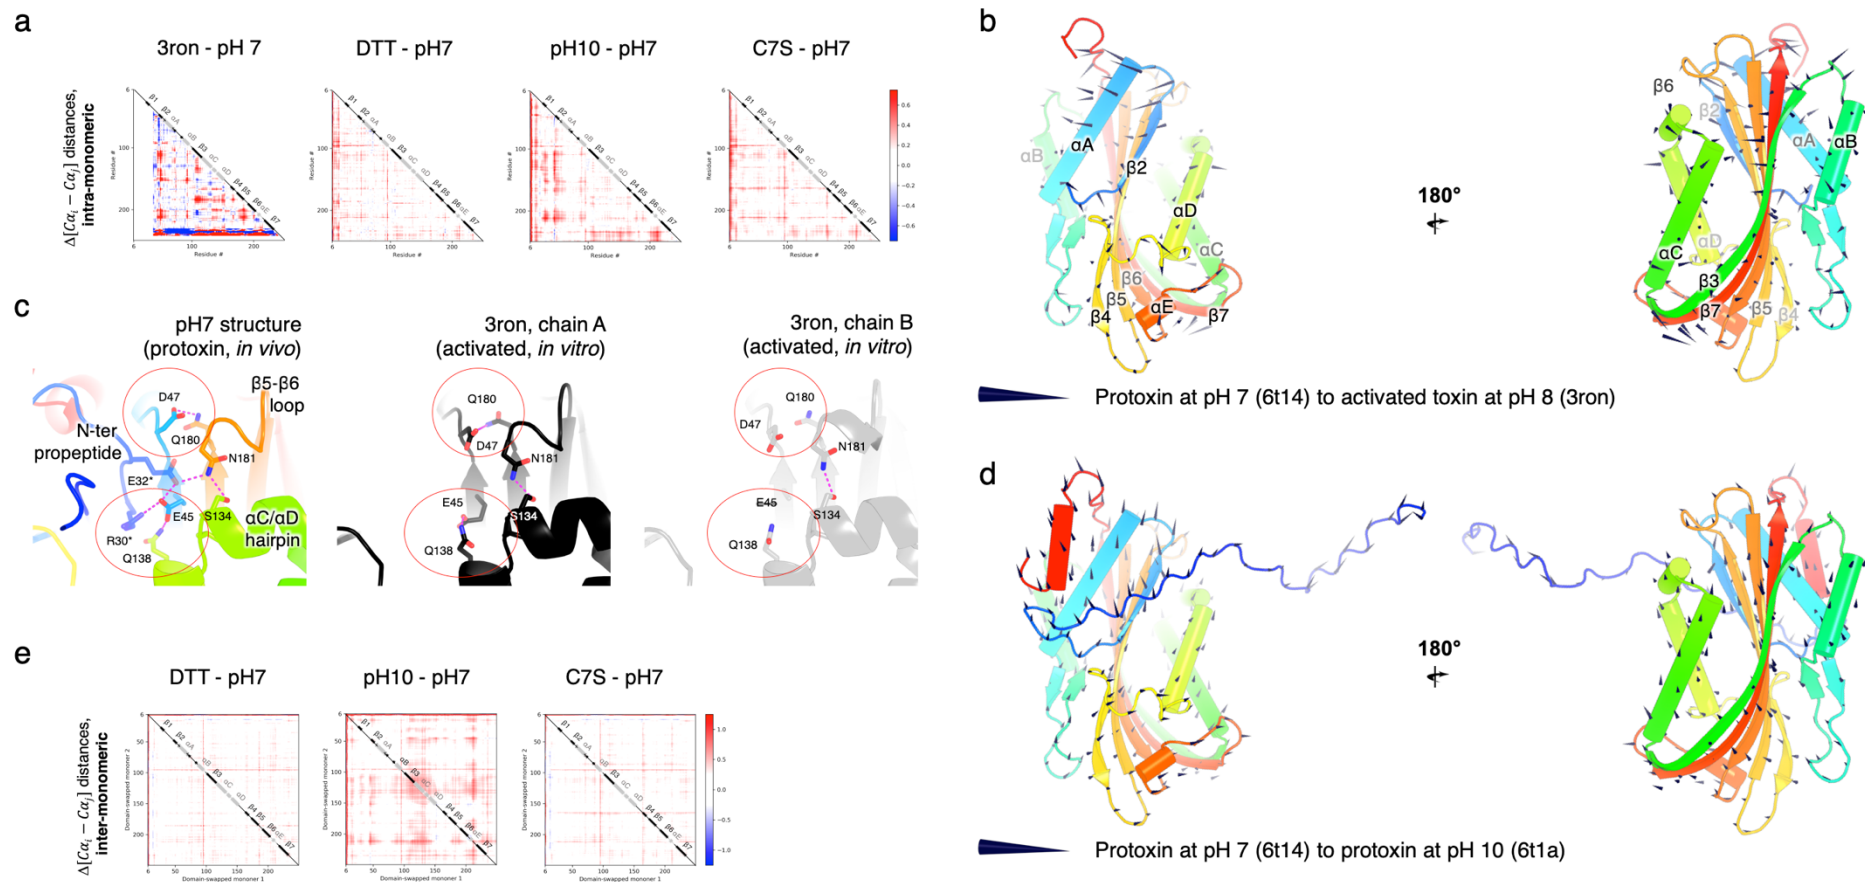

**Supplementary Fig. 2. Structural differences between the Cyt1Aa protoxin and toxin structure.** **a**, From left to right, intramolecular difference distance matrices highlight changes in C $\alpha$ -C $\alpha$  distances with respect to the protoxin structure ('pH7' structure) upon proteolytic activation (3ron), soaking with DTT ('DTT' structure), pH elevation ('pH10' structure) or C7S mutation ('C7S' structure), respectively. **b**, Porcupine plot highlighting the displacement of C $\alpha$  atoms between the protoxin ('pH7' structure) and toxin structures (3ron). Each arrow shows the direction along which a C $\alpha$  atom moves upon proteolytic activation, with the length of the arrow scaling to the amplitude of the motion; here, arrows are 10 times larger than the distance travelled by C $\alpha$  atoms. No data is shown for residues 234-238, which concentrate the largest conformational changes and whose C $\alpha$ -arrows would dominate the plot, rendering visualisation of other motions difficult. **c**, The H-bond between E138 and E45, which tethers the  $\alpha$ C/ $\alpha$ D hairpin to the  $\beta$ -sheet (left panel; same colouring as in **b**), is affected by proteolytic activation, being either preserved in a different conformation (chain A of the asymmetric unit; middle panel) or absent (no density for E45 in chain B of the asymmetric unit; right panel) in the activated toxin structure (3ron). Red cycles highlight the side chain conformational changes of interest. **d**, Porcupine plot highlighting the displacement of C $\alpha$  atoms between the protoxin structure at pH7 ('pH7' structure) and at pH 10 ('pH10 structure'). Each arrow shows the direction along which a C $\alpha$  atom moves upon pH elevation, with the length of the arrow scaling to the amplitude of the motion; here, arrows are 10 times larger than the distance travelled by C $\alpha$  atoms. **e**, From left to right, intermolecular difference distance matrices highlight changes in C $\alpha$ -C $\alpha$  distances between monomers in the domain-swapped dimer upon soaking with DTT, pH elevation or C7S mutation, respectively.

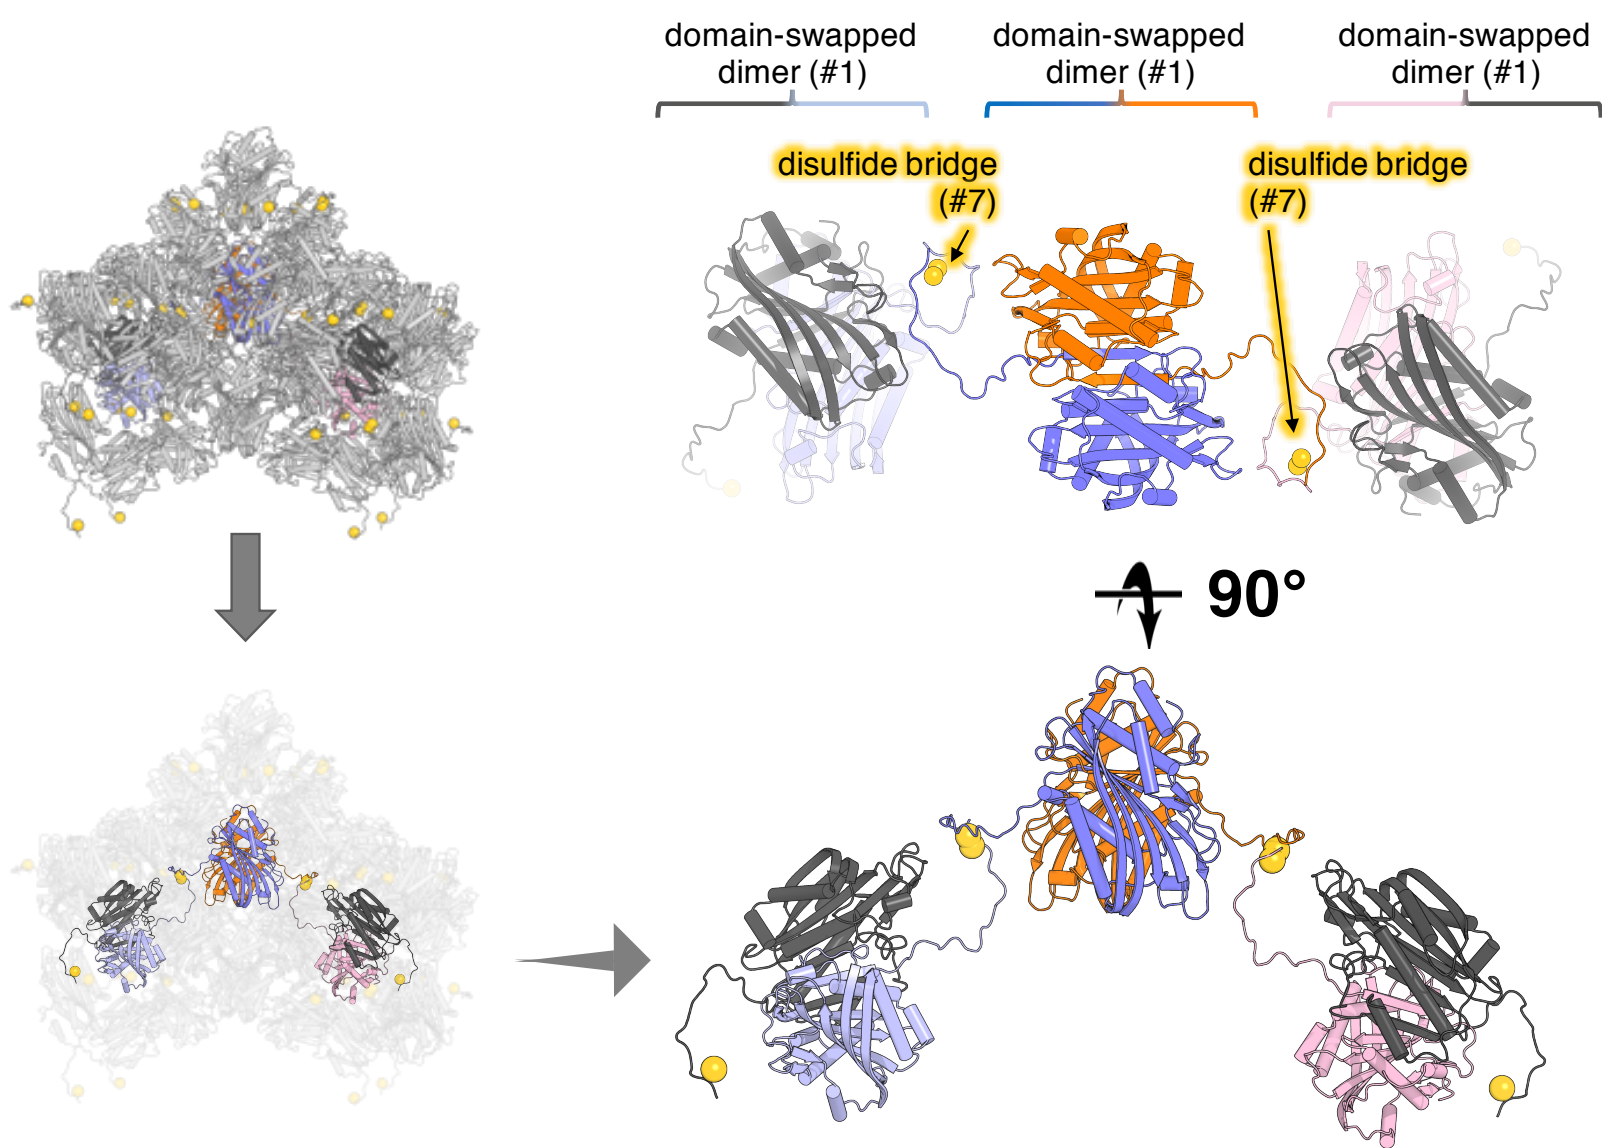

**Supplementary Fig. 3. The natural Cyt1Aa crystals are highly packed.** a, Natural Cyt1Aa crystals display a solvent content of ~33% and feature chains of domain-swapped (DS) dimers associated by disulfide bridges. For more details on crystal packing interfaces, please see Supplementary Table 1.

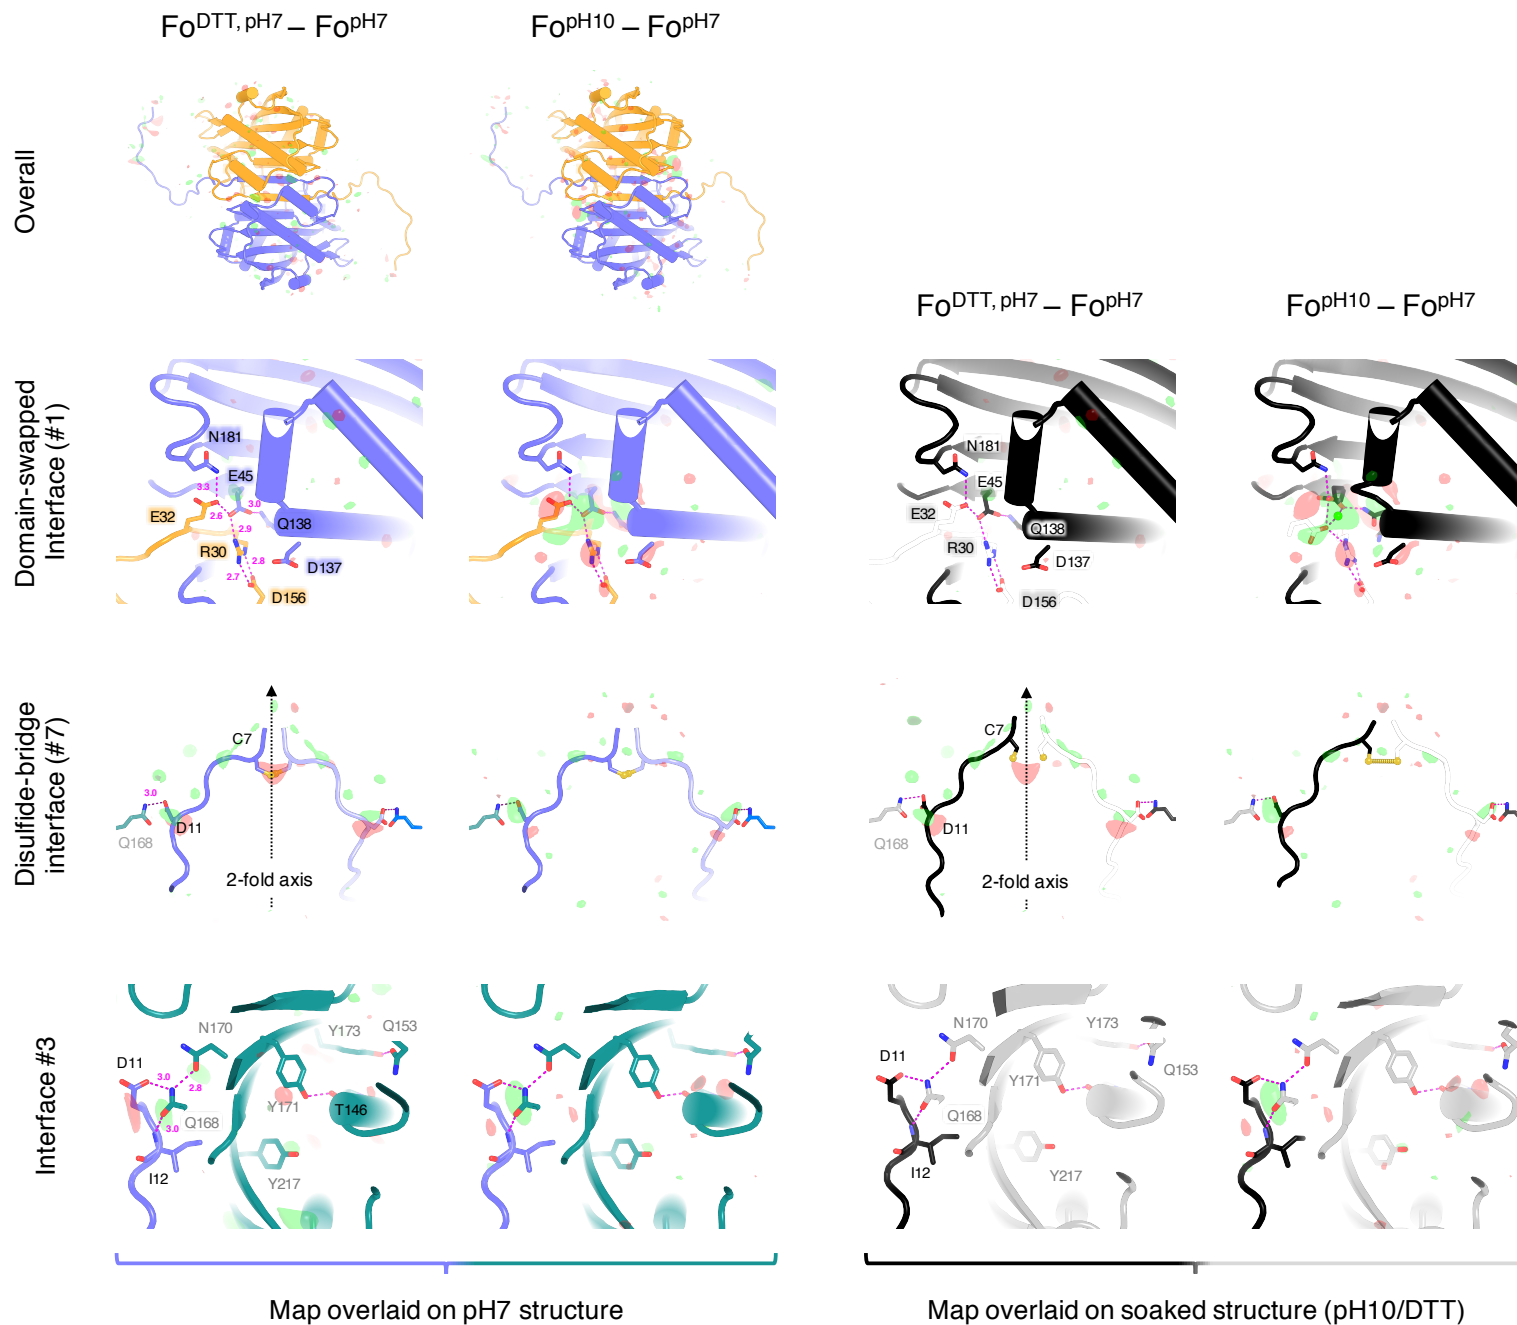

**Supplementary Fig. 4. Fourier difference maps shed light on the crystal dissolution mechanism.** Fourier difference maps computed between datasets, and phased by the pH7 structure, highlight the most striking conformational changes upon DTT soak ( $F_{O}^{DTT} - F_{O}^{pH7}$  map) and pH elevation ( $F_{O}^{pH10} - F_{O}^{pH7}$  map). These are overlaid on the pH7 protoxin structure, shown as an orange/slate-coloured ribbon, in the two left panels; and on the DTT/pH10 protoxin structure, shown as a black/white-coloured ribbon, in the two right panels. Symmetry related molecules are all coloured differently, with each molecule having the same colour coding in all panels. From top to bottom, the figure shows the maps contoured at  $\pm 3$  sigma around the full DS dimer, at the DS and cysteine interfaces, and at crystal packing interface 3, respectively, with positive and negative peaks shown in green and red.

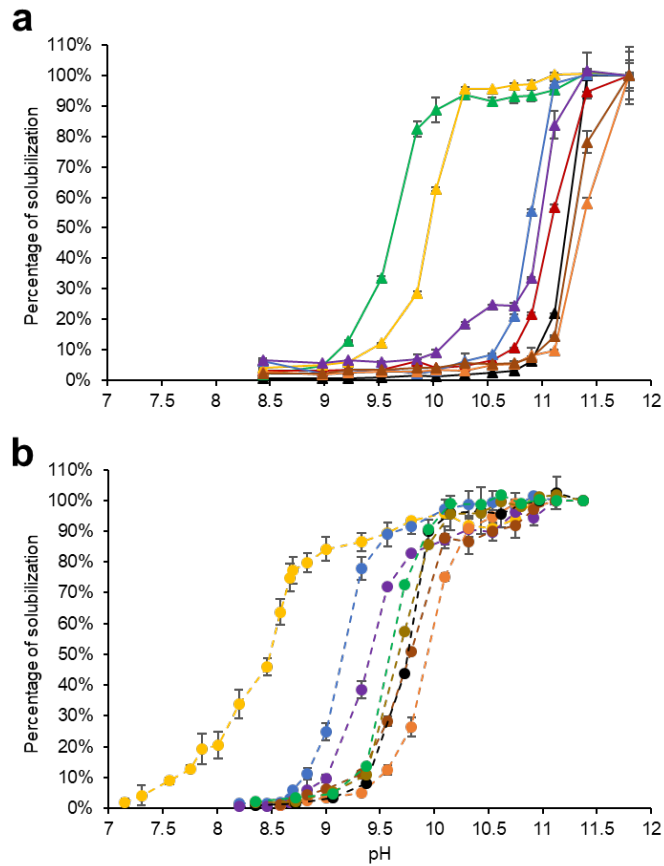

**Supplementary Fig. 5. The pH-sensitivity of Cyt1Aa crystals depends on the redox condition and can be influenced by single atom substitutions.** The concentration of solubilized toxin was measured following resuspension at different pHs in the absence (a) or presence (b) of DTT. Crystals of WT (black), C7S (green), C190V (red), Y171F (purple), D11N (blue), Q168E (yellow), E32Q (brown) and E45Q (orange) Cyt1Aa were assayed. Data are presented as percentage of solubilization relative to solubilization at the highest pH tested (mean  $\pm$  SD). Source data are provided as a Source Data file.



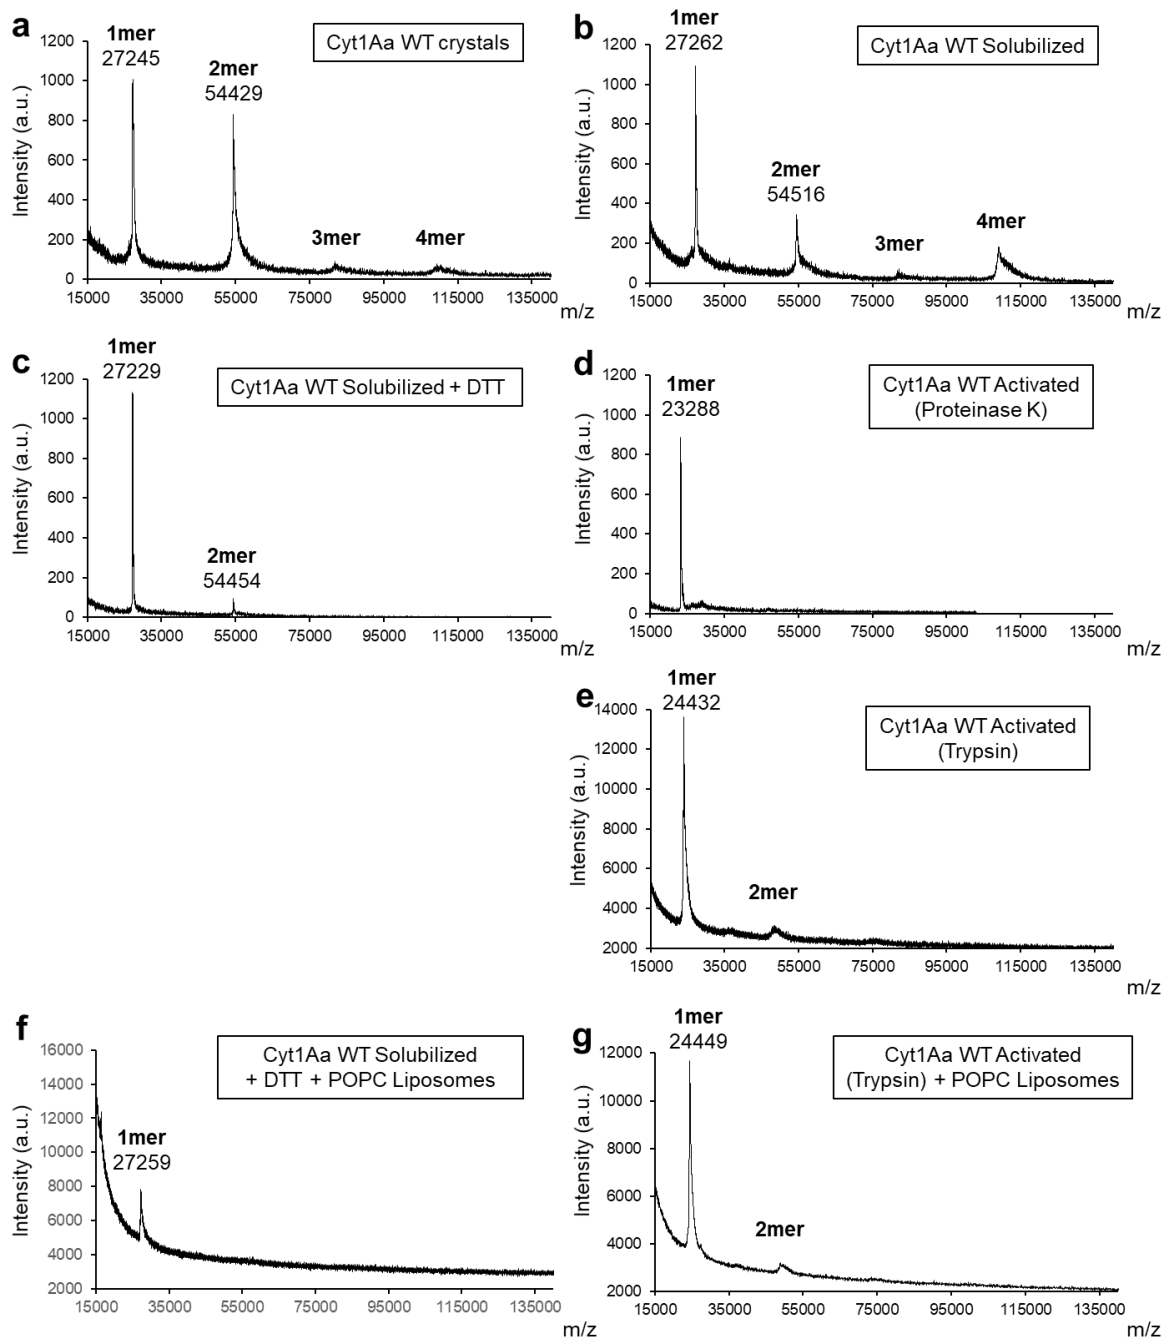

**Supplementary Fig. 6. MALDI-ToF mass spectrometry confirms the SDS-PAGE characterization of the species released upon solubilization of Cyt1Aa crystals.** In the various panels, we report spectra for different Cyt1Aa samples, prepared as indicated in the overlaid box. The observed  $m/z$  values for the monomeric  $[M+H]^+$  (all spectra) and dimeric  $[2M+H]^+$  (spectra **a** to **c**) species are indicated. The calculated (theoretical) average mass for Cyt1Aa protoxin is 27341.17 Da. The data were collected either directly from crystals (**a**) or from crystals solubilized in 0.1 M  $\text{Na}_2\text{CO}_3$  buffer at pH 11.8 in absence (**b**) or presence of DTT (**c**). Solubilized protoxin activated into toxin by the use of proteinase K (**d**) or trypsin (**e**) were also analysed. The data collected on MBO (**f**, **g**) show that these are formed from fully-sized monomers of the protoxin (**f**) and proteolytically-activated toxin (**g**), respectively.

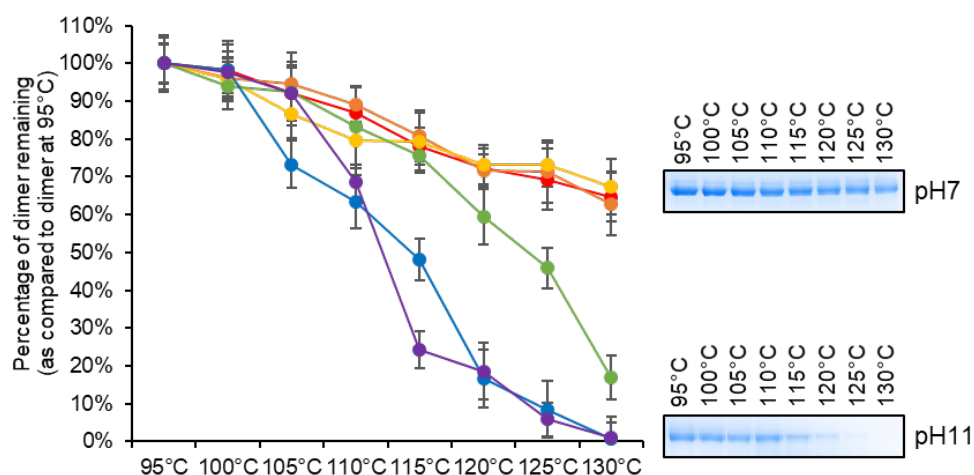

**Supplementary Fig. 7. The high-temperature stability profile of the Cyt1Aa dimer at various pH is suggestive of a covalent disulfide link between monomers.** The stability of the WT Cyt1Aa dimer was tested in two different forms: within crystals at pH7 (red) and as a soluble dimer at pH 7 (brown), 8 (yellow), 9 (green), 10 (blue) and 11 (purple), following crystals dissolution at pH 11.8 in the absence of DTT and subsequent pH equilibration. Samples were heated to 95-130°C for 5 min prior to loading on a 12 % SDS-PAGE gel. The amount of remaining dimer was evaluated by measuring the intensity of the corresponding band. For each pH, the ratio between the amount of dimer released at the various temperatures and that released at 95°C is reported. Each temperature was tested in triplicate. Data are represented as mean  $\pm$  SE. Source data and uncropped images are provided as a Source Data file.

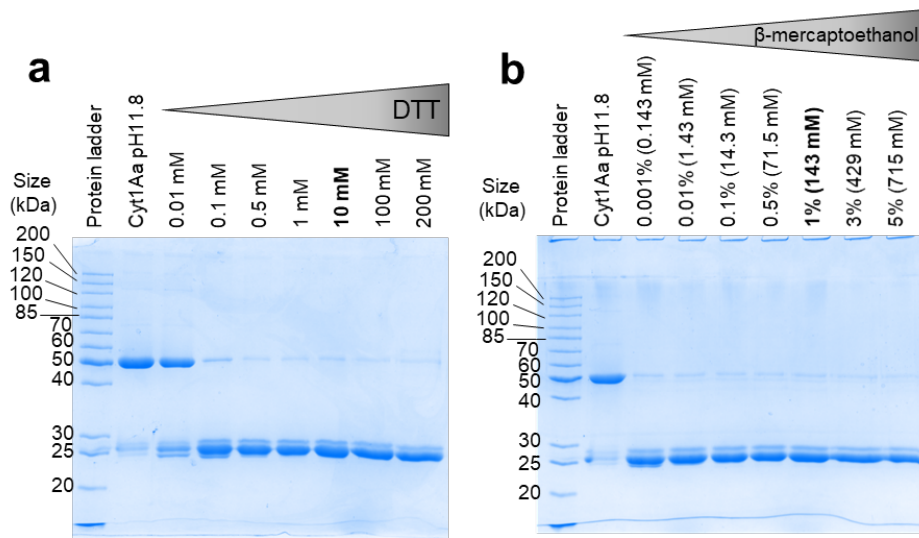

**Supplementary Fig. 8. The Cyt1Aa dimer released upon dissolution of crystals at alkaline pH is highly sensitive to reducing agents.** Crystals of WT Cyt1Aa were solubilized at pH 11.8, in absence or presence of increasing concentrations of DTT (a) or  $\beta$ -mercaptoethanol (b), prior to loading on 12% SDS-PAGE gel. The DTT and  $\beta$ -mercaptoethanol concentrations used in others assays are highlighted in bold. Uncropped images are provided as a Source Data file.

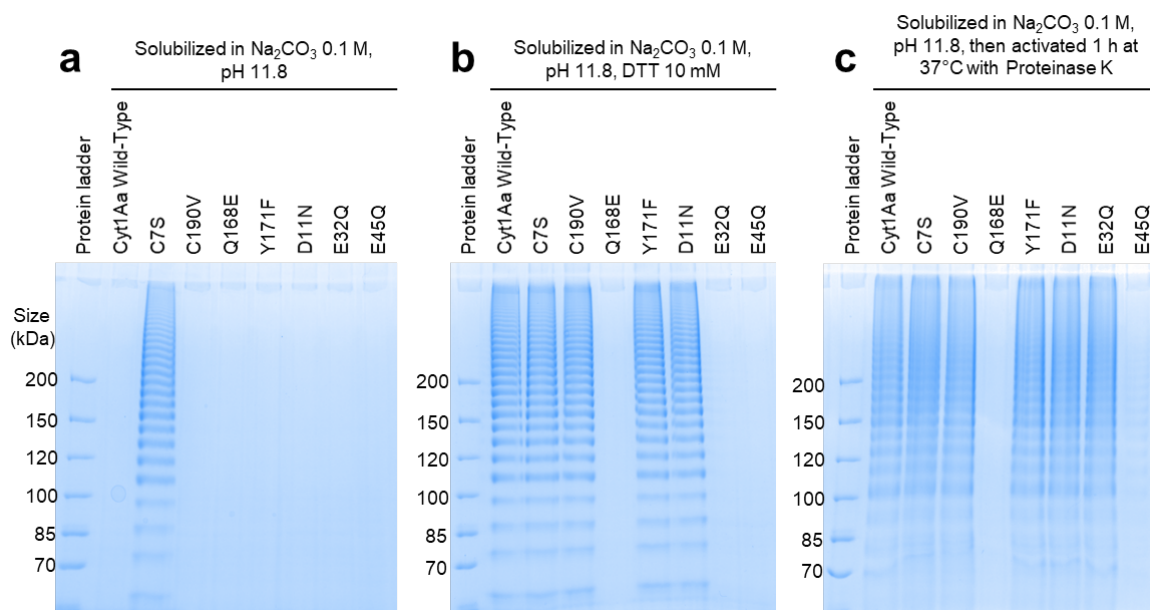

**Supplementary Fig. 9. Formation of Cyt1Aa MBO is conditioned by rupture of the disulfide bridge, but can occur in presence of the N-terminal propeptide and be controlled by single atom substitutions.** MBO formation by the disulfide-bridged dimer (a; obtained by solubilization of crystals at pH 11.8 in absence of DTT), the protoxin monomer (b; obtained by solubilization of crystals at pH 11.8 in presence of DTT) and the proteolytically-activated toxin (c; obtained by solubilization of crystals at pH 11.8 followed by 1 h incubation with proteinase K at 37°C) upon contact with 100 nm radius liposomes was assessed for WT and mutant Cyt1Aa by electrophoresis on a 6% SDS-PAGE gel. In the absence of DTT or proteolytic activation (a), only the C7S mutant, released from crystals as a protoxin monomer, is able to form MBO upon contact with liposomes. Rupture of the disulfide bridge by addition of DTT (b) rescues MBO formation by WT Cyt1Aa and mutants other than the E32Q, E45Q and Q168E mutants. Removal of the propeptides (c) elicits MBO formation by the E32Q and E45Q mutants, showing that stabilization of the DS dimer inhibits MBO formation. Contrastingly, the Q168E mutant remains unable to form MBO even after removal of the propeptide, suggesting that the mutation blocks a crucial step in the interaction of Cyt1Aa with the lipid membrane. Uncropped images are provided as a Source Data file.

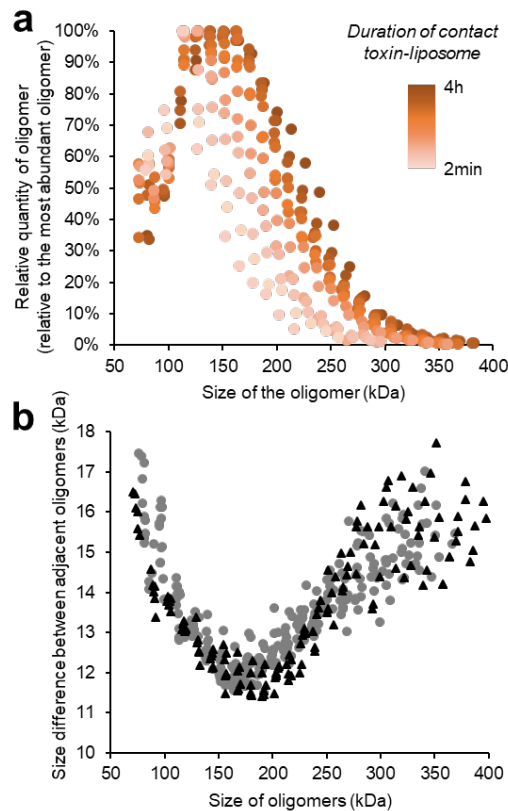

**Supplementary Fig. 10. Prolonged incubation of Cyt1Aa with liposomes results in larger MBO, but their size and spacing in size in SDS-PAGE gels cannot be trusted to estimate their actual mass.** Crystals of Cyt1Aa WT were solubilized at pH 11.8 in presence of DTT and incubated with liposomes (100 nm radius) for times ranging from 2 min (light orange) to 4 h (dark brown) prior to loading on a 6% SDS-PAGE gel stained with InstantBlue. ImageJ software v1.51k was used to measure the intensity of each oligomer band. **a**, MBO appear on 6% SDS-PAGE gels as a ladder of bands whose maximal size increases as function of time. Assuming that each band corresponds to a full Cyt1Aa monomer increment, as inferred from mass spectrometry measurements which showed that the building block of MBO is a fully-sized monomer of the protoxin (Supplementary Fig. 6f) or proteolytically-activated toxin (Supplementary Fig. 6g), the minimal and maximal sizes observed on the gels after 4 hours are indicative of at least trimers (first band migrating at ~79 and ~72 kDa for the protoxin and activated toxin, respectively) to 26-mers (~0.6 MDa). **b**, Estimation of the molecular mass of oligomers by performing a regression based on the molecular mass markers nonetheless indicates a maximum size of 0.35 MDa and suggests a spacing of ~14 kDa between the bands (after 2 hours of incubation) that varies with the size of the oligomers (values were extracted from six and nine different gels for protoxin (black triangle) and activated toxin (gray circles), respectively). This observation highlights the importance of mass spectrometry in complement of electrophoresis to cross-validate observations and identify experimental biases; it indeed could have been interpreted as a second proteolytic step taking place post-insertion of Cyt1Aa in the membrane. Source data are provided as a Source Data file.

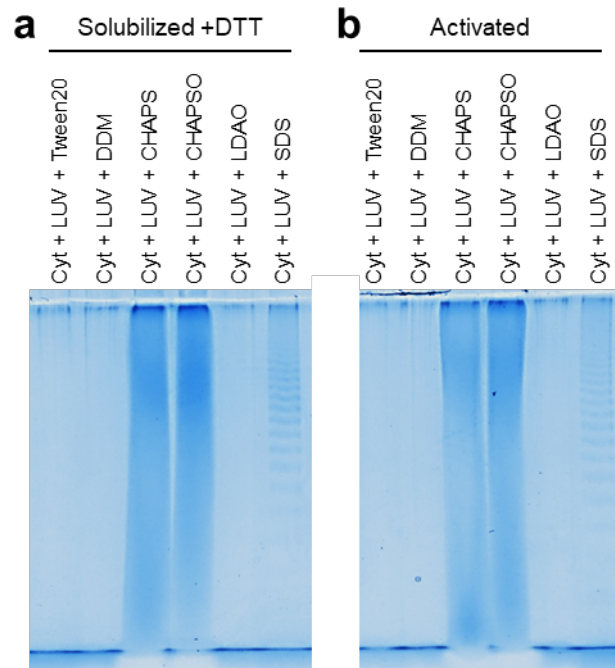

**Supplementary Fig. 11. Detergents other than SDS are unable to induce the stepwise dissociation of MBO.** WT monomeric Cyt1Aa protoxin (**a**; crystals solubilized at pH 11.8, in presence of DTT) and activated toxin (**b**; crystals solubilized at pH 11.8 and incubated for 1 h with proteinase K at 37°C) were incubated with liposomes (100 nm radius) for 1 hour. Various detergents were added to different aliquots of the sample which were then loaded on a 6% native gel stained with *InstantBlue* after completion of electrophoresis. The ladder profile, characteristic of the step-wise dissociation of MBO as they migrate through SDS-PAGE gels, is only visible when SDS is the detergent used to treat the MBO prior to their loading on the native PAGE gels. Other detergents tested are unable to induce this step-wise dissociation, and MBO therefore do not penetrate the gel. These observations highlight the unique ability of SDS in enabling the breakdown and identification of Cyt1Aa MBO. They also suggest that non SDS-treated MBO are likely larger than ~0.6 MDa, *i.e.* the largest size that could be estimated on our 6% acrylamide gels. Note that contrast and luminosity were adjusted to facilitate the visualization of the ladder-like pattern. Uncropped images without contrast optimization are provided as a Source Data file.

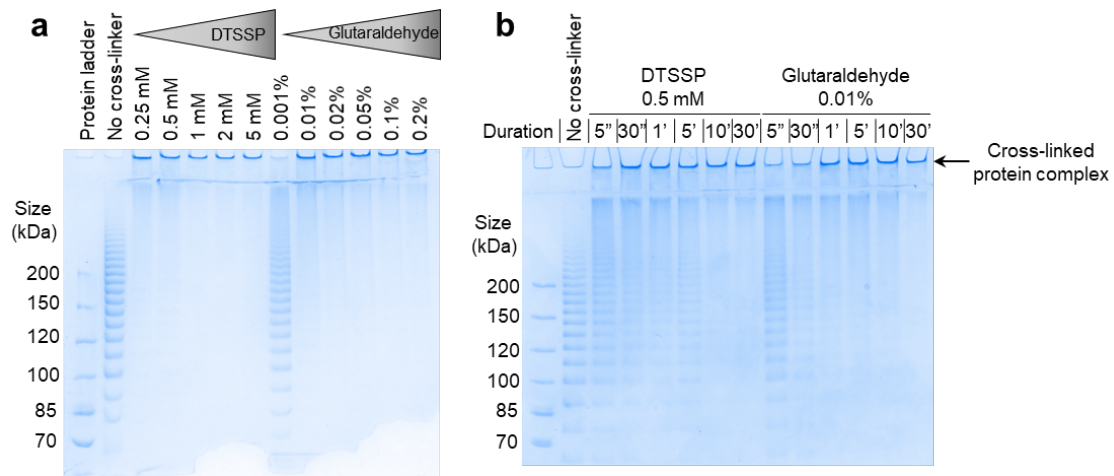

**Supplementary Fig. 12. Cross-linking of Cyt1Aa MBO suggests that they are larger than visible on SDS-PAGE gels.** WT Cyt1Aa MBO were prepared by addition of the activated toxin (crystals solubilized at pH 11.8 and incubated for 1 h with proteinase K at 37°C) to liposomes (100 nm), and cross-linked by incubation with DTSSP or glutaraldehyde at different concentrations and for different times. **a**, Two hours incubation with the cross-linkers at various concentrations allowed identifying the minimal concentration required to cross-link MBO while still allowing penetration into the 6% SDS-PAGE gels, viz. 0.5 mM DTSSP and 0.01 % glutaraldehyde. **b**, We attempted to capture the kinetics of MBO formation by incubating these for various times (from 5 s to 30 min) with 0.5 mM DTSSP or 0.01 % glutaraldehyde. After 5 min incubation, the MBO do not undergo stepwise dissociation in the presence of SDS, indicating that they have been efficiently cross-linked, but they also do not penetrate the stacking gel anymore, suggesting that they are far larger than ~0.6 MDa. Uncropped images are provided as a Source Data file.

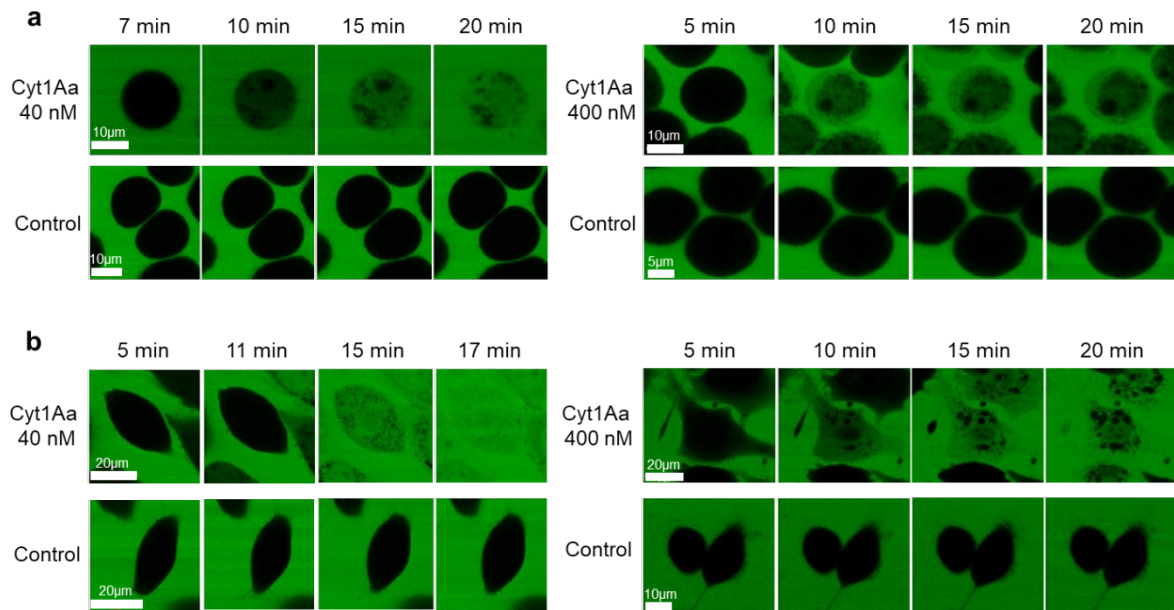

**Supplementary Fig. 13. Time-series confocal fluorescence micrographs reveal the process of membrane permeabilization.** Insect Sf21 (a) and mammalian NIH fibroblast (b) cells were co-exposed to 1.4 nm FITC-dextran and to either Cyt1Aa toxin (at 40 or 400 nM) or to buffer (control). Micrographs suggest a cytotoxicity mechanism whereby Cyt1Aa forms large holes in cell membranes upon insertion in these, enabling dextran beads to enter the cytoplasm within minutes at sub-lethal concentrations. Note that contrast and luminosity were adjusted for better visualization as in Fig. 5b-c.



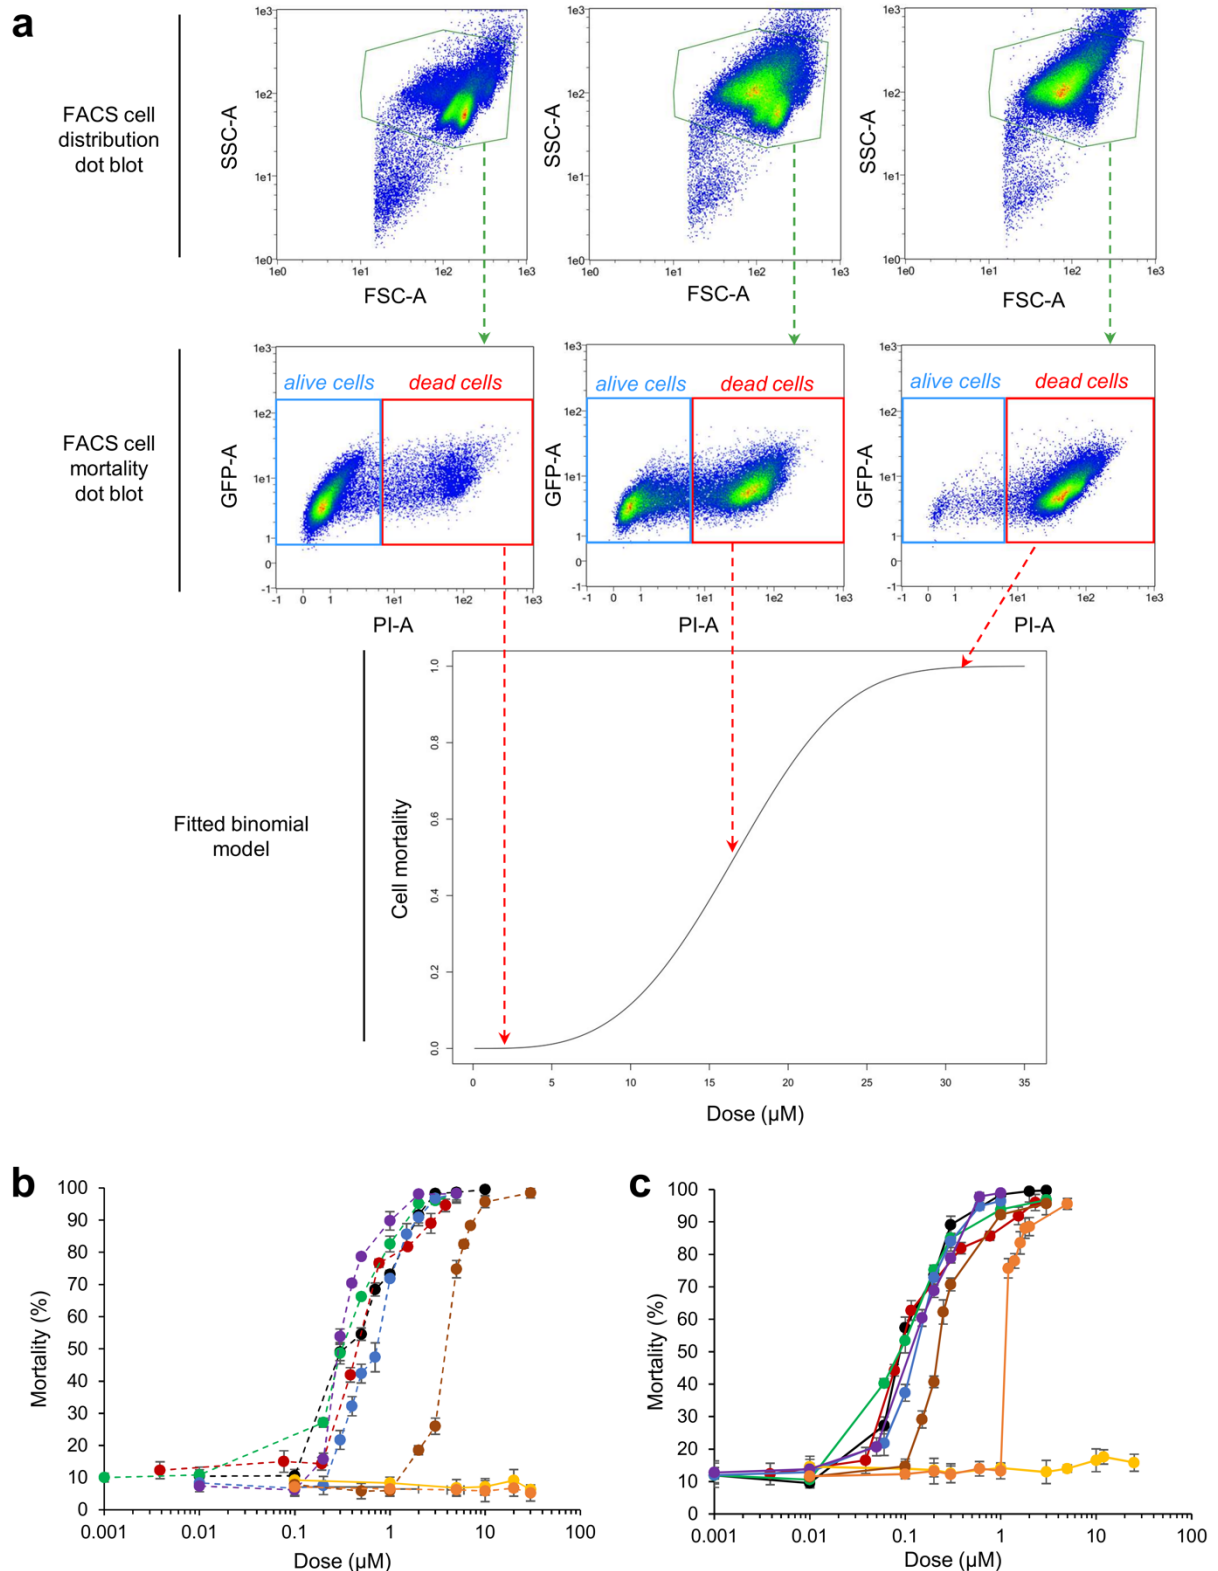

**Supplementary Fig. 14. Cytotoxicity of WT and mutants Cyt1Aa protoxin and activated toxin monomers.** **a**, Sigmoidal binomial model of mortality used to fit the FACS cell mortality data obtained by co-incubation with the toxin and propidium iodide (PI). Upon cell membrane rupture, PI penetrates cells and binds to their DNA, leading to an increase in its fluorescence at 617 nm, upon excitation at 475 nm. In the upper plots, only cells inside the green heptagon are considered for mortality analysis, which is conservative while allowing discarding most cell debris and cell clumps. The shape of the green zone was designed to encompass all

usable cells from all conditions and the same shape was used for all doses of all toxins. In the middle plots showing raw FACS cell mortality dot blot data, red squares indicate the cell population considered positive for PI insertion and therefore counted as dead, while the blue squares indicate living cells. **b-c**, Protoxin (**b**) and activated toxin monomers (**c**) of WT (black), C7S (green), C190V (red), Y171F (purple), D11N (blue), Q168E (yellow), E32Q (brown) and E45Q (orange) Cyt1Aa were assayed for toxicity against HEK293 cells at different concentrations. Toxicity of the E32Q (brown) mutant is significantly different from that of the WT in the protoxin form, but not in the activated toxin form. This result evidences that stabilization of the DS dimer results in inhibition of toxicity. Toxicity of the E45Q (orange) mutant is abrogated in the protoxin form and strongly affected in the activated toxin form, in line with the dual role of this residue in stabilizing the DS dimer and in tethering the  $\alpha$ C/ $\alpha$ D hairpin atop the  $\beta$ -sheet in each monomer, respectively. The Q168E (yellow) mutant shows no cytotoxic activity, in both the toxin and protoxin form, suggesting that this mutation effects on the interaction of the toxin with cell membranes. Values are indicated as mean  $\pm$  SD. Source data are provided as a Source Data file.

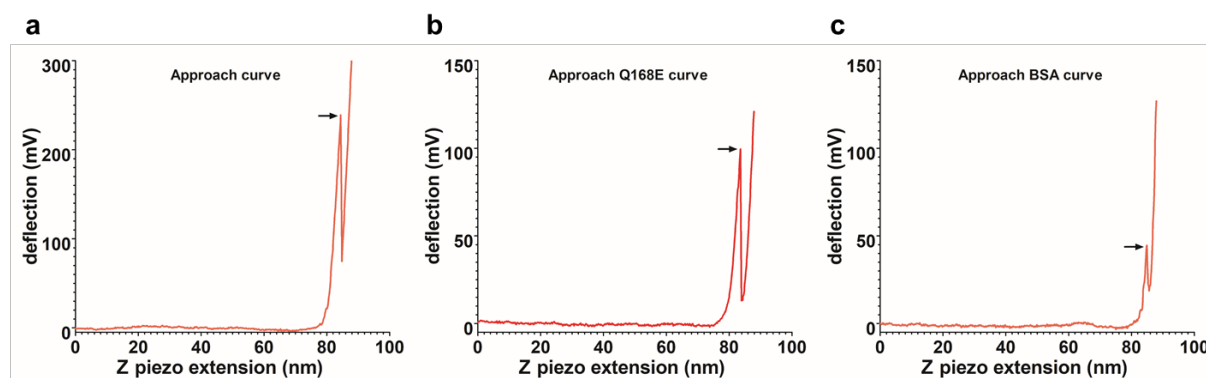

**Supplementary Fig. 15. Force-distance curves confirms the presence of membrane bilayers in AFM experiments.** Presence of the bilayer was confirmed before addition of WT Cyt1Aa in the kinetics experiments (**a**) and after the addition of Q168E mutant (**b**) and BSA control (**c**). Corresponding results are presented in Fig. 5d-k, 5l and 5m, respectively. Black arrows indicate the typical puncturing of the membrane.

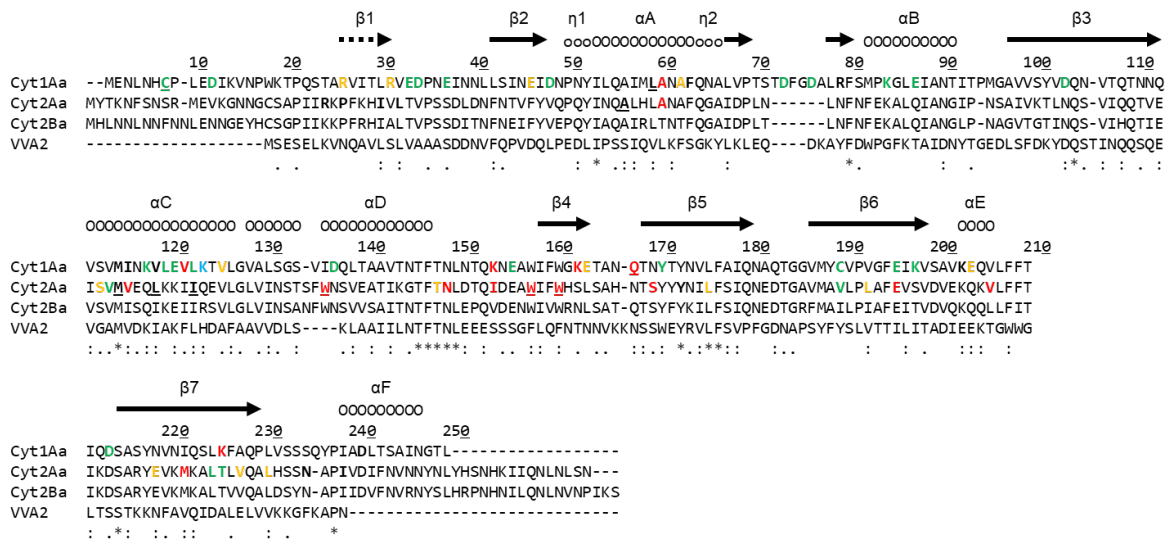

**Supplementary Fig. 16. Sequence conservation across members and affiliates of the Cyt family of proteins, and known effects of point-mutations.** Alignment of Cyt1Aa, Cyt2Aa, Cyt2Ba and VVA2 sequences was performed using the ClustalW software available in the PBIL Expsy tool (52) ([http://npsa-pbil.ibcp.fr/cgi-bin/npsa\\_automat.pl?page=/NPSA/npsa\\_clustalw.html](http://npsa-pbil.ibcp.fr/cgi-bin/npsa_automat.pl?page=/NPSA/npsa_clustalw.html)). The secondary structure of the Cyt1Aa protoxin, derived from DSSP calculation, is highlighted on top of the aligned sequences. Arrows represent  $\beta$ -sheets (numbered from  $\beta$ 1 to  $\beta$ 7, with  $\beta$ 1 belonging to the N-terminal propeptide), “O” represent  $\alpha$ -helices (from  $\alpha$ A to  $\alpha$ F) and “o” represent  $3_{10}$  helices (from  $\eta$ 1 to  $\eta$ 3).  $\beta$ 1 is represented by a dashed arrow. For each toxin, residues that have been challenged by point-mutations are indicated in bold. Residues whose mutation affected the solubility of the crystal are underlined. Residues whose mutation increased, decreased, suppressed or did not affect the toxicity are coloured in blue, orange, red and green, respectively. Residue conservation between the four sequences is indicated by “\*” (identity), “:” (highly conserved) and “.” (conserved). Information regarding the effect of point mutations performed in the present study and by others before us are centralized in the Supplementary Table 3.

## **Supplementary Tables 1-4**

**Supplementary Table 1. Summary of crystal packing interactions.**

**Supplementary Table 2. Output and statistics from the GLM analyses used to calculate the pH solubilizing 50% of crystals ( $SP_{50}$ ) and the dose killing 50% of cell population ( $LC_{50}$ ).**

**Supplementary Table 3. Effect of point Cyt1Aa and Cyt2Aa mutations performed in the present study and by others before us on crystal formation, solubility and toxin toxicity.**

**Supplementary Table 4. List of all primers used for plasmid construction.**

**Supplementary Table 1 | Summary of crystal packing interactions.**

| Interface number | Description                                                                                                                                                                                                                                                                                                                                                                                                                                                                                                                                                                                                                                                                                                                                                                                                                                                                                                                                                                                                                                                                                                                       |
|------------------|-----------------------------------------------------------------------------------------------------------------------------------------------------------------------------------------------------------------------------------------------------------------------------------------------------------------------------------------------------------------------------------------------------------------------------------------------------------------------------------------------------------------------------------------------------------------------------------------------------------------------------------------------------------------------------------------------------------------------------------------------------------------------------------------------------------------------------------------------------------------------------------------------------------------------------------------------------------------------------------------------------------------------------------------------------------------------------------------------------------------------------------|
| <b>Overall</b>   | <p>The asymmetric unit monomer is shown as a ribbon colored in slate. In the natural crystals, it establishes contact with nine symmetry-related mates, shown as ribbons of different colors, with each molecule having the same colour coding in all panels. In the following panels, atoms involved in the discussed interface(s) are shown as spheres, with carbon atoms colored as the ribbon, and nitrogen, oxygen and sulfur atoms colored in blue, red and yellow, respectively. Below, the reported H-bonds are those found by PISA, further filtered on the basis of a minimal distance of 3.2 Å between non-hydrogen atoms. We also used PISA to calculate the per-monomer buried surface area. For the sake of concision, only H-bonds expected to be pH-sensitive are explicitly discussed below. These include H-bonds wherein an acidic residue is involved, with specific focus on those wherein the acidic oxygen is an obligate donor, because such H-bonds are bound to break upon deprotonation due to elevation of pH.</p> 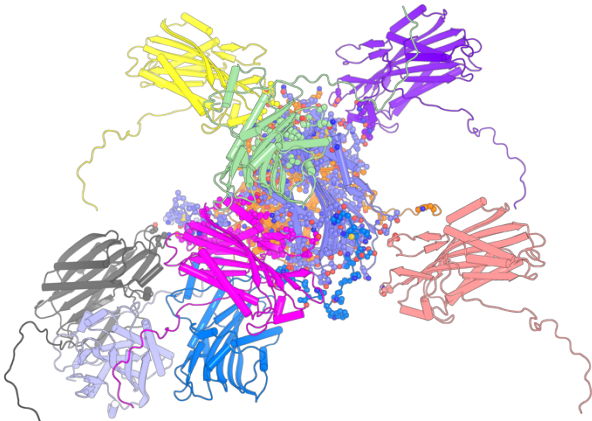 |

1 Domain swapped interface, classified as a stable block by PISA (predicted  $\Delta G = -27.1$  kcal/mol). Residues 6, 18-60, 71, 134, 137, 138, 140, 141, 144, 145, 149-160, 181+203, 208-213 and 233-247 (C-terminal propeptide) from both chains are involved. The N-terminal ( $\beta 1$  and  $\beta 2$ ) and C-terminal ( $\alpha F$ ) propeptides as well as the  $\alpha C/\alpha D$  hairpin are buried at this interface which features 46 H-bonds and two salt-bridges. The salt-bridges involve R30 (NH1) and D45 (OE2) from facing monomers in the DS dimer. H-bonds previewed to disrupt upon pH elevation include those between facing T23(OG1) and D33(OD1), and N181(ND2) and E32(OE2), respectively, but most importantly, that between E32(OE1) and E45 (OE2) wherein the latter atom is an obligate donor.

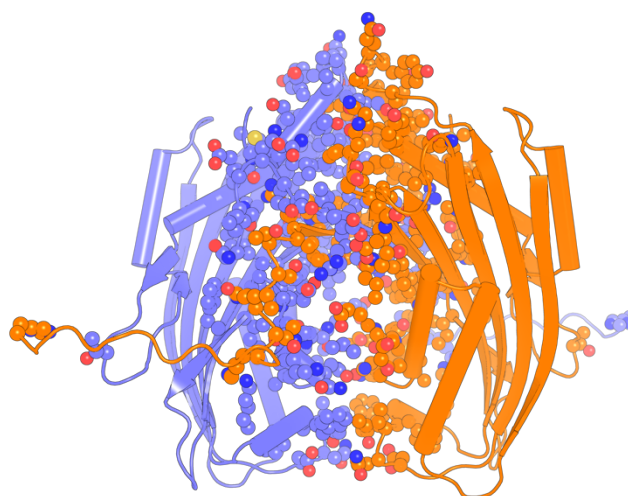

Per monomer buried surface area: 3077 Å<sup>2</sup>

2 Residues 13-19 (N-terminal propeptide), 103, 106 ( $\beta 3$ ), 111, 113, 114, 117, 118, 121, 122, 124, 125, 129, 140 ( $\alpha C/\alpha D$ ) and 212 ( $\alpha E$ ) from the asymmetric unit monomer interact with residues 33, 36, 37 ( $\beta 1$ - $\beta 2$  loop), 53, 54, 57, 63, 64, 66, 68, 71, 75, 77, 83, 86, 87, 90, 92, 93 ( $\alpha A/\alpha B$ ), 228, 231 ( $\beta 7$ ), 233, 235, 236, 237, 240, 248 and 249 (C-terminal propeptide) from the symmetry-related mate.

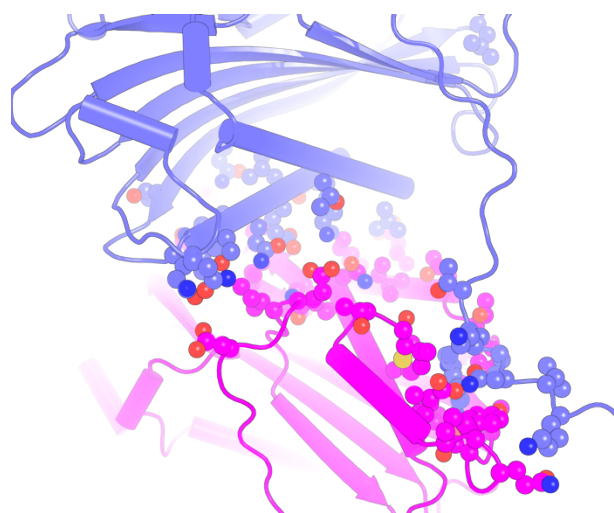

Four H-bonds are found at this interface, of which one involves the side chain oxygen of an acidic residue, viz. that between N15(ND2) and D240(OD2). A salt-bridge is also found at this interface, viz. between K118(NZ) and D75(OD1).

Per monomer buried surface area: 770 Å<sup>2</sup>

**3** Residues 102-104 (β3), 108-114 (β4), 167-170 (β4-β5 loop), 196-200 and 216-220 (αE) from the asymmetric unit monomer interact with residues 6-23 from the symmetry-related mate.

Six H-bonds are found at this interface, of which a single involves the side chain oxygen of an acidic residues, viz. that between Q168(NE2) and D11(OD1). A salt-bridge is also found, viz. between K198(NZ) and D11(OD1).

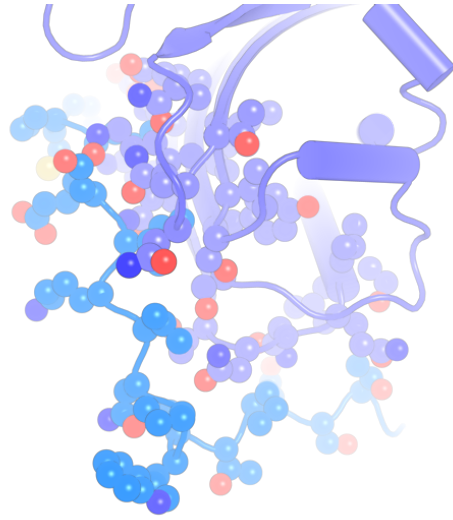

Per monomer buried surface area: 646 Å<sup>2</sup>

**4** Residues 89, 94-98 (αB-β3 loop), 130 (αC/αD hairpin), 182-189 (β5-β6 loop), and 227-229 (β7), from both chains are involved.

There is no H-bond or salt-bridge at this interface.

Per monomer buried surface area: 411 Å<sup>2</sup>

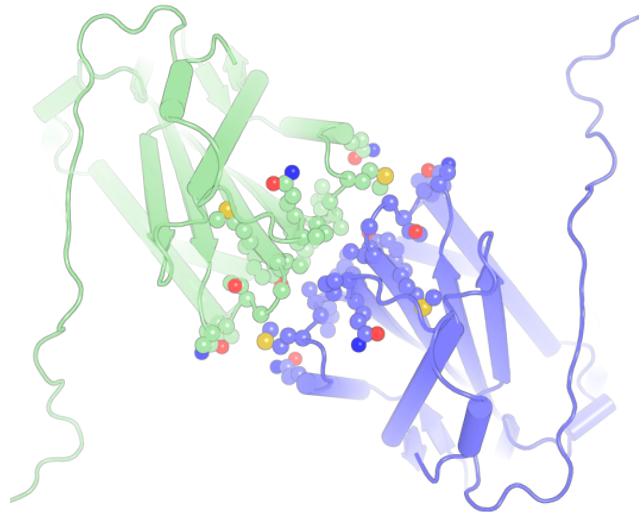

- 5 Residues 35, 36 ( $\beta 1$ - $\beta 2$  loop), 239, 242, 243, 246, 248, 249 (C-terminal propeptide) from the asymmetric unit monomer interact with residues 151, 154, 155, 164 ( $\alpha D$ - $\beta 4$  loop), 204, 207, 208 ( $\alpha E$ ) from the symmetry-related mate.

The three H-bonds found at this interface involve side chain oxygens of acidic residues, viz. E36(OE2), which interacts with N151(ND2); and E204(OE1) and (OE2), which interact with T248(OG) and N35(ND2), respectively.

Per monomer buried surface area: 225 Å<sup>2</sup>

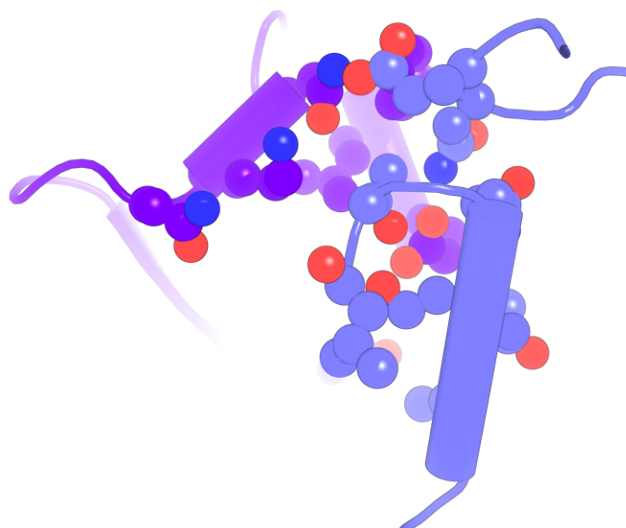

- 6 Residues 48-50 ( $\beta 2$ - $\alpha A$  loop), 232, 234 and 235 (C-terminal loop) from the asymmetric unit monomer interact with residues 164-166 ( $\beta 4$ - $\beta 5$  loop) and 202, 204, 205 ( $\alpha E$ ) from the symmetry-related mate.

There is no H-bond or salt-bridge at this interface, which nonetheless participates in reducing access to Q168.

Per monomer buried surface area: 224 Å<sup>2</sup>

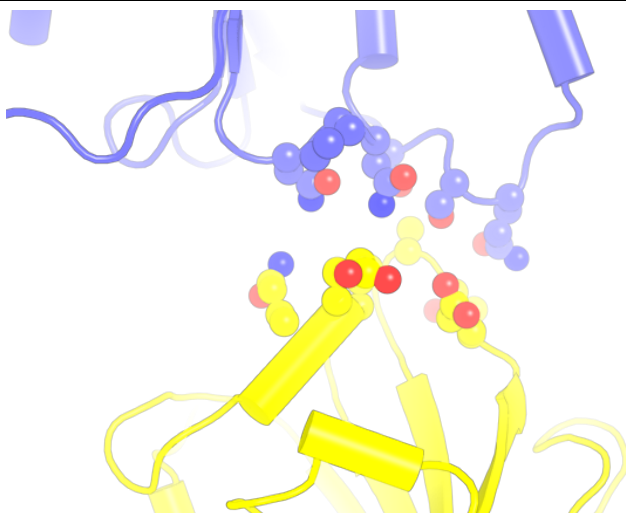



|          |                                                                                                                                                                                                                                                                                                                  |                                                                                      |
|----------|------------------------------------------------------------------------------------------------------------------------------------------------------------------------------------------------------------------------------------------------------------------------------------------------------------------|--------------------------------------------------------------------------------------|
| <p>7</p> | <p>Disulfide-bridged interface.</p> <p>Residues 6-8 (N-terminal propeptide) from both chains are involved, with a disulfide bridge at position C7.</p> <p>There is no H-bond or salt-bridge at this interface.</p> <p>Per monomer buried surface area: 71 Å<sup>2</sup></p>                                      | 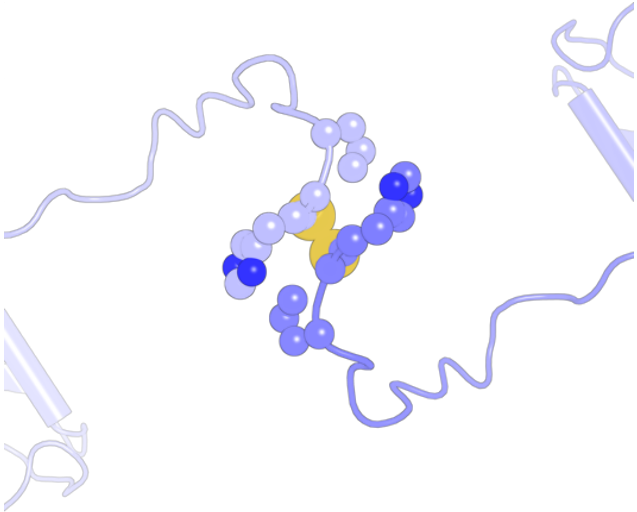   |
| <p>8</p> | <p>Residues 72 (tip of the αA/αB hairpin) and 167 (β4-β5 loop) from both chains are involved.</p> <p>There is no H-bond or salt-bridge at this interface, which nonetheless participates in reducing access to Q168.</p> <p>Per monomer buried surface area: 37 Å<sup>2</sup></p>                                |   |
| <p>9</p> | <p>Residues 9 and 10 (N-terminal propeptide) from the asymmetric unit monomer interact with residues 71 (tip of the αA/αB hairpin) and 163 (β4-β5 loop) from the symmetry-related mate.</p> <p>There is no H-bond or salt-bridge at this interface.</p> <p>Per monomer buried surface area: 27 Å<sup>2</sup></p> |  |

**Supplementary Table 2. Output and statistics from the GLM analyses used to calculate the pH solubilizing 50% of crystals ( $SP_{50}$ ) and the dose killing 50% of cell population ( $LC_{50}$ ).**

## Model fitting & calculation of pH for solubilizing 50% of crystals

\*\*\*\*\*

Cyt1Aa WT

\*\*\*\*\*

Deviance results:

probit logit cloglog cauchit  
1 3.740734 2.263416 2.007052 0.3755288

Call:

glm(formula = x ~ log(d), family = family(i), data = status)

Deviance Residuals:

Min 1Q Median 3Q Max  
-0.25531 -0.02203 -0.00035 0.01654 0.38683

Coefficients:

Estimate Std. Error z value Pr(>|z|)  
(Intercept) -503.7 633.0 -0.796 0.426  
log(d) 208.7 262.9 0.794 0.427

(Dispersion parameter for binomial family taken to be 1)

Null deviance: 20.52227 on 26 degrees of freedom  
Residual deviance: 0.37553 on 25 degrees of freedom  
AIC: 6.2365

Number of Fisher Scoring iterations: 9

\$ld.est

LD SE LCL UCL  
p = 0.50: 11.175 1.013 10.901 11.456  
p = 0.90: 11.341 1.028 10.743 11.973  
p = 0.95: 11.518 1.047 10.519 12.613

\$comparison

[1] 1

\$R2\_Naglekerke

[1] 0.983

\*\*\*\*\*

C190V

\*\*\*\*\*

Deviance results:

probit logit cloglog cauchit  
1 4.236168 3.019759 2.195564 0.4530417

Call:

glm(formula = x ~ log(d), family = family(i), data = status)

Deviance Residuals:

| Min      | 1Q       | Median  | 3Q      | Max     |
|----------|----------|---------|---------|---------|
| -0.14563 | -0.02570 | 0.04302 | 0.12708 | 0.34333 |

Coefficients:

|             | Estimate | Std. Error | z value | Pr(> z ) |
|-------------|----------|------------|---------|----------|
| (Intercept) | -206.73  | 169.38     | -1.221  | 0.222    |
| log(d)      | 85.99    | 70.47      | 1.220   | 0.222    |

(Dispersion parameter for binomial family taken to be 1)

Null deviance: 18.18970 on 26 degrees of freedom  
Residual deviance: 0.45304 on 25 degrees of freedom  
AIC: 9.3694

Number of Fisher Scoring iterations: 8

\$ld.est

|           | LD     | SE    | LCL    | UCL    |
|-----------|--------|-------|--------|--------|
| p = 0.50: | 11.069 | 1.012 | 10.811 | 11.332 |
| p = 0.90: | 11.472 | 1.033 | 10.772 | 12.218 |
| p = 0.95: | 11.912 | 1.064 | 10.552 | 13.447 |

\$comparison

[1] 1

\$R2\_Naglekerke

[1] 0.978

\*\*\*\*\*

C7S

\*\*\*\*\*

Deviance results:

|   | probit   | logit    | cloglog  | cauchit   |
|---|----------|----------|----------|-----------|
| 1 | 1.363429 | 1.059124 | 2.115507 | 0.4529237 |

Call:

glm(formula = x ~ log(d), family = family(i), data = status)

Deviance Residuals:

| Min      | 1Q       | Median  | 3Q      | Max     |
|----------|----------|---------|---------|---------|
| -0.16446 | -0.04119 | 0.02593 | 0.12109 | 0.25711 |

Coefficients:

|             | Estimate | Std. Error | z value | Pr(> z ) |
|-------------|----------|------------|---------|----------|
| (Intercept) | -125.96  | 94.28      | -1.336  | 0.182    |
| log(d)      | 55.75    | 41.73      | 1.336   | 0.182    |

(Dispersion parameter for binomial family taken to be 1)

Null deviance: 17.94163 on 26 degrees of freedom

Residual deviance: 0.45292 on 25 degrees of freedom  
AIC: 9.8699

Number of Fisher Scoring iterations: 8

\$ld.est

|           | LD     | SE    | LCL   | UCL    |
|-----------|--------|-------|-------|--------|
| p = 0.50: | 9.578  | 1.019 | 9.234 | 9.935  |
| p = 0.90: | 10.122 | 1.047 | 9.254 | 11.070 |
| p = 0.95: | 10.727 | 1.091 | 9.042 | 12.726 |

\$comparison

[1] 1

\$R2\_Naglekerke

[1] 0.977

\*\*\*\*\*

D11N

\*\*\*\*\*

Deviance results:

|   | probit   | logit    | cloglog  | cauchit   |
|---|----------|----------|----------|-----------|
| 1 | 6.076062 | 4.377727 | 3.466947 | 0.8981412 |

Call:

glm(formula = x ~ log(d), family = family(i), data = status)

Deviance Residuals:

| Min      | 1Q       | Median  | 3Q      | Max     |
|----------|----------|---------|---------|---------|
| -0.12277 | -0.01163 | 0.06309 | 0.22727 | 0.37583 |

Coefficients:

|             | Estimate | Std. Error | z value | Pr(> z ) |
|-------------|----------|------------|---------|----------|
| (Intercept) | -299.6   | 268.6      | -1.116  | 0.265    |
| log(d)      | 125.6    | 112.5      | 1.116   | 0.264    |

(Dispersion parameter for binomial family taken to be 1)

Null deviance: 23.30151 on 26 degrees of freedom  
Residual deviance: 0.89814 on 25 degrees of freedom  
AIC: 8.6484

Number of Fisher Scoring iterations: 10

\$ld.est

|           | LD     | SE    | LCL    | UCL    |
|-----------|--------|-------|--------|--------|
| p = 0.50: | 10.869 | 1.009 | 10.686 | 11.056 |
| p = 0.90: | 11.139 | 1.023 | 10.648 | 11.652 |
| p = 0.95: | 11.430 | 1.046 | 10.460 | 12.489 |

\$comparison

[1] 1

\$R2\_Naglekerke

[1] 0.976

\*\*\*\*\*

E32Q

\*\*\*\*\*

Deviance results:

probit logit cloglog cauchit  
1 4.434995 3.183111 2.331268 0.3711623

Call:

glm(formula = x ~ log(d), family = family(i), data = status)

Deviance Residuals:

Min 1Q Median 3Q Max  
-0.08973 -0.02631 0.07428 0.09440 0.39096

Coefficients:

Estimate Std. Error z value Pr(>|z|)  
(Intercept) -240.50 204.51 -1.176 0.240  
log(d) 99.17 84.28 1.177 0.239

(Dispersion parameter for binomial family taken to be 1)

Null deviance: 16.01616 on 26 degrees of freedom  
Residual deviance: 0.37116 on 25 degrees of freedom  
AIC: 7.707

Number of Fisher Scoring iterations: 8

\$ld.est

LD SE LCL UCL  
p = 0.50: 11.305 1.016 10.969 11.652  
p = 0.90: 11.661 1.030 11.005 12.357  
p = 0.95: 12.048 1.057 10.813 13.424

\$comparison

[1] 1

\$R2\_Naglekerke

[1] 0.978

\*\*\*\*\*

E45Q

\*\*\*\*\*

Deviance results:

probit logit cloglog cauchit  
1 4.823316 3.397681 2.446333 0.536153

Call:  
glm(formula = x ~ log(d), family = family(i), data = status)

Deviance Residuals:  
Min 1Q Median 3Q Max  
-0.07358 0.01090 0.07056 0.11252 0.40171

Coefficients:  
Estimate Std. Error z value Pr(>|z|)  
(Intercept) -267.5 264.2 -1.013 0.311  
log(d) 110.0 108.6 1.013 0.311

(Dispersion parameter for binomial family taken to be 1)

Null deviance: 15.90130 on 26 degrees of freedom  
Residual deviance: 0.53615 on 25 degrees of freedom  
AIC: 8.0536

Number of Fisher Scoring iterations: 9

\$ld.est  
LD SE LCL UCL  
p = 0.50: 11.376 1.011 11.141 11.616  
p = 0.90: 11.699 1.029 11.068 12.366  
p = 0.95: 12.048 1.058 10.790 13.453

\$comparison  
[1] 1

\$R2\_Naglekerke  
[1] 0.972

\*\*\*\*\*  
Q168E  
\*\*\*\*\*  
Deviance results:  
probit logit cloglog cauchit  
1 1.616793 1.142576 1.69814 0.5356339

Call:  
glm(formula = x ~ log(d), family = family(i), data = status)

Deviance Residuals:  
Min 1Q Median 3Q Max  
-0.15309 0.06354 0.08847 0.17467 0.24883

Coefficients:  
Estimate Std. Error z value Pr(>|z|)  
(Intercept) -216.29 179.82 -1.203 0.229  
log(d) 94.15 78.24 1.203 0.229

(Dispersion parameter for binomial family taken to be 1)

Null deviance: 23.95575 on 26 degrees of freedom  
Residual deviance: 0.53563 on 25 degrees of freedom  
AIC: 8.7116

Number of Fisher Scoring iterations: 9

\$ld.est

|           | LD     | SE    | LCL   | UCL    |
|-----------|--------|-------|-------|--------|
| p = 0.50: | 9.947  | 1.012 | 9.715 | 10.185 |
| p = 0.90: | 10.278 | 1.029 | 9.711 | 10.877 |
| p = 0.95: | 10.637 | 1.058 | 9.528 | 11.875 |

\$comparison

[1] 1

\$R2\_Naglekerke

[1] 0.983

\*\*\*\*\*

Y171F

\*\*\*\*\*

Deviance results:

|  | probit     | logit    | cloglog  | cauchit  |
|--|------------|----------|----------|----------|
|  | 1 4.488139 | 3.640097 | 2.401891 | 1.663891 |

Call:

glm(formula = x ~ log(d), family = family(i), data = status)

Deviance Residuals:

| Min      | 1Q      | Median  | 3Q      | Max     |
|----------|---------|---------|---------|---------|
| -0.33055 | 0.05185 | 0.13613 | 0.26819 | 0.51428 |

Coefficients:

|             | Estimate | Std. Error | z value | Pr(> z ) |
|-------------|----------|------------|---------|----------|
| (Intercept) | -128.02  | 92.85      | -1.379  | 0.168    |
| log(d)      | 53.59    | 38.90      | 1.378   | 0.168    |

(Dispersion parameter for binomial family taken to be 1)

Null deviance: 18.3382 on 26 degrees of freedom  
Residual deviance: 1.6639 on 25 degrees of freedom  
AIC: 12.33

Number of Fisher Scoring iterations: 10

\$ld.est

| LD | SE | LCL | UCL |
|----|----|-----|-----|
|----|----|-----|-----|



p = 0.50: 10.902 1.015 10.590 11.223  
p = 0.90: 11.547 1.047 10.556 12.630  
p = 0.95: 12.266 1.092 10.314 14.586

\$comparison  
[1] 1

\$R2\_Naglekerke  
[1] 0.936

\*\*\*\*\*

Cyt1Aa WT + DTT  
\*\*\*\*\*

Deviance results:  
probit logit cloglog cauchit  
1 2.389225 2.008871 3.969117 0.8496498

Call:  
glm(formula = x ~ log(d), family = family(i), data = status)

Deviance Residuals:  
Min 1Q Median 3Q Max  
-0.33320 -0.16867 -0.12742 -0.02102 0.27780

Coefficients:  
Estimate Std. Error z value Pr(>|z|)  
(Intercept) -147.07 114.21 -1.288 0.198  
log(d) 64.51 50.05 1.289 0.197

(Dispersion parameter for binomial family taken to be 1)

Null deviance: 20.70769 on 25 degrees of freedom  
Residual deviance: 0.84965 on 24 degrees of freedom  
AIC: 9.9208

Number of Fisher Scoring iterations: 8

\$ld.est  
LD SE LCL UCL  
p = 0.50: 9.776 1.016 9.484 10.076  
p = 0.90: 10.253 1.040 9.500 11.066  
p = 0.95: 10.781 1.079 9.285 12.518

\$comparison  
[1] 1

\$R2\_Naglekerke  
[1] 0.961

\*\*\*\*\*

C190V + DTT

\*\*\*\*\*

probit logit cloglog cauchit  
1 2.254215 1.608174 3.996601 0.5829255

Call:  
glm(formula = x ~ log(d), family = family(i), data = status)

Deviance Residuals:  
Min 1Q Median 3Q Max  
-0.35542 -0.04057 0.04221 0.10167 0.22353

Coefficients:  
Estimate Std. Error z value Pr(>|z|)  
(Intercept) -226.78 220.58 -1.028 0.304  
log(d) 99.78 96.91 1.030 0.303

(Dispersion parameter for binomial family taken to be 1)

Null deviance: 23.12126 on 25 degrees of freedom  
Residual deviance: 0.58293 on 24 degrees of freedom  
AIC: 8.5075

Number of Fisher Scoring iterations: 8

\$ld.est  
LD SE LCL UCL  
p=0.50: 9.706 1.012 9.487 9.930  
p=0.90: 10.010 1.029 9.458 10.594  
p=0.95: 10.340 1.061 9.206 11.613

\$comparison  
[1] 1

\$R2\_Naglekerke  
[1] 0.977

\*\*\*\*\*

C7S + DTT  
\*\*\*\*\*

probit logit cloglog cauchit  
1 2.469138 1.755875 4.308441 0.2826912

Call:  
glm(formula = x ~ log(d), family = family(i), data = status)

Deviance Residuals:  
Min 1Q Median 3Q Max  
-0.221603 -0.056826 -0.001174 0.054000 0.225291

Coefficients:

```
Estimate Std. Error z value Pr(>|z|)
(Intercept) -208.33 191.35 -1.089 0.276
log(d) 91.98 84.16 1.093 0.274
```

(Dispersion parameter for binomial family taken to be 1)

```
Null deviance: 22.25151 on 25 degrees of freedom
Residual deviance: 0.28269 on 24 degrees of freedom
AIC: 7.6208
```

Number of Fisher Scoring iterations: 8

\$ld.est

```
LD SE LCL UCL
p=0.50: 9.631 1.020 9.270 10.007
p=0.90: 9.959 1.029 9.408 10.542
p=0.95: 10.315 1.060 9.209 11.555
```

\$comparison

[1] 1

\$R2\_Naglekerke

[1] 0.989

\*\*\*\*\*

Y171F+ DTT

\*\*\*\*\*

```
probit logit cloglog cauchit
1 2.828521 2.692725 5.749051 2.393754
```

Call:

```
glm(formula = x ~ log(d), family = family(i), data = status)
```

Deviance Residuals:

```
Min 1Q Median 3Q Max
-0.37737 -0.27014 -0.19502 -0.08495 0.30468
```

Coefficients:

```
Estimate Std. Error z value Pr(>|z|)
(Intercept) -99.88 51.40 -1.943 0.0520 .
log(d) 44.36 22.82 1.944 0.0519 .
```

---

Signif. codes: 0 '\*\*\*' 0.001 '\*\*' 0.01 '\*' 0.05 '.' 0.1 ' ' 1

(Dispersion parameter for binomial family taken to be 1)

```
Null deviance: 37.6225 on 47 degrees of freedom
Residual deviance: 2.3938 on 46 degrees of freedom
AIC: 16.584
```

Number of Fisher Scoring iterations: 8

\$ld.est

|           | LD     | SE    | LCL   | UCL    |
|-----------|--------|-------|-------|--------|
| p = 0.50: | 9.503  | 1.016 | 9.215 | 9.800  |
| p = 0.90: | 10.186 | 1.039 | 9.443 | 10.987 |
| p = 0.95: | 10.956 | 1.077 | 9.468 | 12.679 |

\$comparison

[1] 1

\$R2\_Naglekerke

[1] 0.962

\*\*\*\*\*

D11N + DTT

\*\*\*\*\*

|   | probit   | logit    | cloglog  | cauchit  |
|---|----------|----------|----------|----------|
| 1 | 4.072643 | 3.144755 | 7.950213 | 1.297011 |

Call:

glm(formula = x ~ log(d), family = family(i), data = status)

Deviance Residuals:

| Min      | 1Q       | Median   | 3Q      | Max     |
|----------|----------|----------|---------|---------|
| -0.35280 | -0.19036 | -0.09556 | 0.02622 | 0.23885 |

Coefficients:

|             | Estimate | Std. Error | z value | Pr(> z ) |
|-------------|----------|------------|---------|----------|
| (Intercept) | -148.19  | 82.41      | -1.798  | 0.0721 . |
| log(d)      | 66.71    | 37.05      | 1.800   | 0.0718 . |

---

Signif. codes: 0 '\*\*\*' 0.001 '\*\*' 0.01 '\*' 0.05 '.' 0.1 ' ' 1

(Dispersion parameter for binomial family taken to be 1)

Null deviance: 42.682 on 47 degrees of freedom  
Residual deviance: 1.297 on 46 degrees of freedom  
AIC: 12.416

Number of Fisher Scoring iterations: 8

\$ld.est

|           | LD     | SE    | LCL   | UCL    |
|-----------|--------|-------|-------|--------|
| p = 0.50: | 9.220  | 1.016 | 8.935 | 9.514  |
| p = 0.90: | 9.655  | 1.029 | 9.122 | 10.220 |
| p = 0.95: | 10.135 | 1.055 | 9.124 | 11.258 |

\$comparison

[1] 1

\$R2\_Naglekerke

[1] 0.976

\*\*\*\*\*

Q168E+DTT

\*\*\*\*\*

|   |          |          |          |          |
|---|----------|----------|----------|----------|
|   | probit   | logit    | cloglog  | cauchit  |
| 1 | 4.190581 | 3.609607 | 6.948139 | 1.897533 |

Call:

glm(formula = x ~ log(d), family = family(i), data = status)

Deviance Residuals:

|  |          |          |          |         |         |
|--|----------|----------|----------|---------|---------|
|  | Min      | 1Q       | Median   | 3Q      | Max     |
|  | -0.43735 | -0.14579 | -0.06320 | 0.05378 | 0.33611 |

Coefficients:

|             |          |            |         |          |
|-------------|----------|------------|---------|----------|
|             | Estimate | Std. Error | z value | Pr(> z ) |
| (Intercept) | -47.900  | 19.703     | -2.431  | 0.0151 * |
| log(d)      | 22.437   | 9.193      | 2.441   | 0.0147 * |

---

Signif. codes: 0 '\*\*\*' 0.001 '\*\*' 0.01 '\*' 0.05 '.' 0.1 ' ' 1

(Dispersion parameter for binomial family taken to be 1)

Null deviance: 37.3550 on 68 degrees of freedom  
Residual deviance: 1.8975 on 67 degrees of freedom  
AIC: 31.631

Number of Fisher Scoring iterations: 7

\$ld.est

|           |        |       |       |        |
|-----------|--------|-------|-------|--------|
|           | LD     | SE    | LCL   | UCL    |
| p = 0.50: | 8.456  | 1.019 | 8.152 | 8.771  |
| p = 0.90: | 9.699  | 1.058 | 8.690 | 10.825 |
| p = 0.95: | 11.204 | 1.120 | 8.968 | 13.997 |

\$comparison

[1] 1

\$R2\_Naglekerke

[1] 0.955

\*\*\*\*\*

E32Q+DTT

\*\*\*\*\*

probit logit cloglog cauchit

1 1.299407 1.132439 2.620451 0.9753236

Call:  
glm(formula = x ~ log(d), family = family(i), data = status)

Deviance Residuals:  
Min 1Q Median 3Q Max  
-0.34378 -0.14796 -0.07592 0.01604 0.33836

Coefficients:  
Estimate Std. Error z value Pr(>|z|)  
(Intercept) -108.75 61.56 -1.767 0.0773 .  
log(d) 47.64 26.98 1.766 0.0774 .

---  
Signif. codes: 0 '\*\*\*' 0.001 '\*\*' 0.01 '\*' 0.05 '.' 0.1 ' ' 1

(Dispersion parameter for binomial family taken to be 1)

Null deviance: 29.03215 on 38 degrees of freedom  
Residual deviance: 0.97532 on 37 degrees of freedom  
AIC: 15.607

Number of Fisher Scoring iterations: 7

\$ld.est  
LD SE LCL UCL  
p = 0.50: 9.804 1.015 9.518 10.098  
p = 0.90: 10.458 1.041 9.665 11.316  
p = 0.95: 11.193 1.080 9.620 13.023

\$comparison  
[1] 1

\$R2\_Naglekerke  
[1] 0.969

\*\*\*\*\*  
E45Q + DTT  
\*\*\*\*\*  
probit logit cloglog cauchit  
1 1.541617 0.9816774 2.19867 0.5073008

Call:  
glm(formula = x ~ log(d), family = family(i), data = status)

Deviance Residuals:  
Min 1Q Median 3Q Max  
-0.17223 -0.08874 -0.03659 0.06801 0.32434

Coefficients:  
Estimate Std. Error z value Pr(>|z|)

(Intercept) -181.17 111.29 -1.628 0.104  
log(d) 78.88 48.44 1.628 0.103

(Dispersion parameter for binomial family taken to be 1)

Null deviance: 35.4507 on 38 degrees of freedom  
Residual deviance: 0.5073 on 37 degrees of freedom  
AIC: 10.66

Number of Fisher Scoring iterations: 8

\$ld.est

|         | LD     | SE    | LCL   | UCL    |
|---------|--------|-------|-------|--------|
| p=0.50: | 9.943  | 1.016 | 9.644 | 10.250 |
| p=0.90: | 10.338 | 1.029 | 9.779 | 10.930 |
| p=0.95: | 10.771 | 1.053 | 9.740 | 11.912 |

\$comparison

[1] 1

\$R2\_Naglekerke

[1] 0.989

## Model fitting & calculation of concentration for killing 50% of HEK293 cell population

\*\*\*\*\*

Cyt1Aa WT Solubilized

\*\*\*\*\*

```
probit logit cloglog cauchit
1 0.3794631 0.4340959 0.1848265 0.8864705
```

\$Resum

Call:

```
glm(formula = x ~ log(d), family = family(i), data = status)
```

Deviance Residuals:

```
Min 1Q Median 3Q Max
-0.277588 -0.009484 -0.000094 0.077108 0.238158
```

Coefficients:

```
Estimate Std. Error z value Pr(>|z|)
(Intercept) -33.585 26.135 -1.285 0.199
log(d) 3.419 2.641 1.294 0.196
```

(Dispersion parameter for binomial family taken to be 1)

```
Null deviance: 10.09516
Residual deviance: 0.18483
AIC: 5.9924
```

Number of Fisher Scoring iterations: 11

\$ld.est

```
LD SE LCL UCL
p = 0.50: 16589.23 1.293 10017.98 27470.86
p = 0.90: 23568.57 1.294 14213.03 39082.27
p = 0.95: 25454.37 1.342 14310.56 45276.02
```

\$comparison

```
[1] 0.9999972
```

\$R2\_Naglekerke

```
[1] 0.982
```

\*\*\*\*\*

Cyt1Aa WT Solubilized DTT

\*\*\*\*\*

```
probit logit cloglog cauchit
1 0.1649665 0.2317902 0.1500927 0.7561266
```

\$Resum



Call:  
glm(formula = x ~ log(d), family = family(i), data = status)

Deviance Residuals:  
Min 1Q Median 3Q Max  
-0.181304 -0.078387 0.001252 0.032495 0.244431

Coefficients:  
Estimate Std. Error z value Pr(>|z|)  
(Intercept) -6.9367 5.2566 -1.320 0.187  
log(d) 1.1126 0.8149 1.365 0.172

(Dispersion parameter for binomial family taken to be 1)

Null deviance: 6.96673 on 9 degrees of freedom  
Residual deviance: 0.15009 on 8 degrees of freedom  
AIC: 7.8362

Number of Fisher Scoring iterations: 8

\$ld.est  
LD SE LCL UCL  
p=0.50: 366.939 1.938 100.322 1342.117  
p=0.90: 1079.481 2.002 277.056 4205.924  
p=0.95: 1367.525 2.251 278.915 6705.005

\$comparison  
[1] 0.9999988

\$R2\_Naglekerke  
[1] 0.978

\*\*\*\*\*

Cyt1Aa WT Activated

\*\*\*\*\*

probit logit cloglog cauchit  
1 0.0965895 0.122949 0.1449628 0.5113992

\$Resum

Call:  
glm(formula = x ~ log(d), family = family(i), data = status)

Deviance Residuals:  
Min 1Q Median 3Q Max  
-0.20404 -0.01291 0.00056 0.02002 0.20730

Coefficients:

```
      Estimate Std. Error z value Pr(>|z|)
(Intercept) -6.365    6.037 -1.054  0.292
log(d)      1.434    1.281  1.119  0.263
```

(Dispersion parameter for binomial family taken to be 1)

```
Null deviance: 8.228597 on 8 degrees of freedom
Residual deviance: 0.096589 on 7 degrees of freedom
AIC: 6.0894
```

Number of Fisher Scoring iterations: 9

\$ld.est

```
      LD SE LCL  UCL
p=0.50: 84.690 1.763 27.866 257.386
p=0.90: 207.019 2.200 44.154 970.633
p=0.95: 266.719 2.635 39.943 1781.020
```

\$comparison

[1]0.999998

\$R2\_Naglekerke

[1]0.988

\*\*\*\*\*

Cyt1Aa WT Activated DTT

\*\*\*\*\*

```
probit  logit  cloglog  cauchit
1 0.001046012 0.01061426 0.03373632 0.2565856
```

\$Resum

Call:

glm(formula = x ~ log(d), family = family(i), data = status)

Deviance Residuals:

```
    30    31    32    33    34    35    36
-0.0000004 -0.0121812  0.0071729 -0.0138087  0.0058974  0.0249088  0.0005185
```

Coefficients:

```
      Estimate Std. Error z value Pr(>|z|)
(Intercept) -7.402    9.478 -0.781  0.435
log(d)      1.567    1.866  0.840  0.401
```

(Dispersion parameter for binomial family taken to be 1)

```
Null deviance: 6.642721 on 6 degrees of freedom
Residual deviance: 0.001046 on 5 degrees of freedom
AIC: 5.6474
```

Number of Fisher Scoring iterations: 9

\$ld.est

|           | LD      | SE    | LCL    | UCL      |
|-----------|---------|-------|--------|----------|
| p = 0.50: | 112.575 | 1.966 | 29.925 | 423.491  |
| p = 0.90: | 255.048 | 2.213 | 53.760 | 1209.999 |
| p = 0.95: | 321.596 | 2.753 | 44.187 | 2340.603 |

\$comparison

[1] 1

\$R2\_Naglekerke

[1] 1

\*\*\*\*\*

Cyt1Aa C7S Solubilized

\*\*\*\*\*

|  | probit | logit      | cloglog   | cauchit   |
|--|--------|------------|-----------|-----------|
|  | 1      | 0.06107853 | 0.1050184 | 0.0156711 |
|  |        | 0.5714266  |           |           |

\$Resum

Call:

glm(formula = x ~ log(d), family = family(i), data = status)

Deviance Residuals:

|  | Min       | 1Q        | Median   | 3Q       | Max      |
|--|-----------|-----------|----------|----------|----------|
|  | -0.079987 | -0.026321 | 0.000417 | 0.024336 | 0.063507 |

Coefficients:

|             | Estimate | Std. Error | z value | Pr(> z ) |
|-------------|----------|------------|---------|----------|
| (Intercept) | -9.154   | 8.913      | -1.027  | 0.304    |
| log(d)      | 1.481    | 1.405      | 1.054   | 0.292    |

(Dispersion parameter for binomial family taken to be 1)

Null deviance: 7.870847 on 7 degrees of freedom  
Residual deviance: 0.015671 on 6 degrees of freedom  
AIC: 5.5209

Number of Fisher Scoring iterations: 9

\$ld.est

|           | LD       | SE    | LCL     | UCL      |
|-----------|----------|-------|---------|----------|
| p = 0.50: | 378.189  | 1.987 | 98.476  | 1452.414 |
| p = 0.90: | 850.900  | 2.041 | 210.230 | 3443.983 |
| p = 0.95: | 1016.419 | 2.274 | 203.059 | 5087.733 |

\$comparison

[1] 0.9999999

\$R2\_Naglekerke

[1] 0.998

\*\*\*\*\*

Cyt1Aa C7S Solubilized DTT

\*\*\*\*\*

probit logit cloglog cauchit  
1 0.02883597 0.05511702 0.0544168 0.4463203

\$Resum

Call:

glm(formula = x ~ log(d), family = family(i), data = status)

Deviance Residuals:

| Min       | 1Q        | Median    | 3Q       | Max      |
|-----------|-----------|-----------|----------|----------|
| -0.076026 | -0.021628 | -0.000001 | 0.055144 | 0.120252 |

Coefficients:

|             | Estimate | Std. Error | z value | Pr(> z ) |
|-------------|----------|------------|---------|----------|
| (Intercept) | -7.243   | 6.720      | -1.078  | 0.281    |
| log(d)      | 1.275    | 1.126      | 1.132   | 0.257    |

(Dispersion parameter for binomial family taken to be 1)

Null deviance: 7.723538 on 8 degrees of freedom  
Residual deviance: 0.028836 on 7 degrees of freedom  
AIC: 6.8016

Number of Fisher Scoring iterations: 9

\$ld.est

|           | LD       | SE    | LCL     | UCL      |
|-----------|----------|-------|---------|----------|
| p = 0.50: | 293.378  | 1.802 | 92.486  | 930.631  |
| p = 0.90: | 801.714  | 2.355 | 149.627 | 4295.657 |
| p = 0.95: | 1066.074 | 2.895 | 132.746 | 8561.542 |

\$comparison

[1] 1

\$R2\_Naglekerke

[1] 0.996

\*\*\*\*\*

Cyt1Aa C7S Activated

\*\*\*\*\*

```
probit logit cloglog cauchit
1 0.04616299 0.08250545 0.1477006 0.4889797
```

\$Resum

Call:  
glm(formula = x ~ log(d), family = family(i), data = status)

Deviance Residuals:  
Min 1Q Median 3Q Max  
-0.136788 -0.057998 0.001975 0.034705 0.122914

Coefficients:  
Estimate Std. Error z value Pr(>|z|)  
(Intercept) -5.016 4.526 -1.108 0.268  
log(d) 1.157 0.959 1.206 0.228

(Dispersion parameter for binomial family taken to be 1)

Null deviance: 6.734446 on 7 degrees of freedom  
Residual deviance: 0.046163 on 6 degrees of freedom  
AIC: 6.3614

Number of Fisher Scoring iterations: 9

\$ld.est  
LD SE LCL UCL  
p = 0.50: 76.455 1.961 20.432 286.083  
p = 0.90: 231.499 2.451 39.959 1341.165  
p = 0.95: 316.918 3.004 36.712 2735.812

\$comparison  
[1] 0.999998

\$R2\_Naglekerke  
[1] 0.993

\*\*\*\*\*  
Cyt1Aa C7S Activated DTT  
\*\*\*\*\*

```
probit logit cloglog cauchit
1 0.008946602 0.01529912 0.117163 0.1343936
```

\$Resum

Call:  
glm(formula = x ~ log(d), family = family(i), data = status)

Deviance Residuals:

94 95 96 97 98 99 100  
-0.000046 -0.069995 0.028343 0.011586 -0.052025 0.020068 0.000658

Coefficients:

Estimate Std. Error z value Pr(>|z|)  
(Intercept) -5.990 8.044 -0.745 0.456  
log(d) 1.379 1.623 0.850 0.395

(Dispersion parameter for binomial family taken to be 1)

Null deviance: 6.8664476 on 6 degrees of freedom  
Residual deviance: 0.0089466 on 5 degrees of freedom  
AIC: 5.1517

Number of Fisher Scoring iterations: 10

\$ld.est

LD SE LCL UCL  
p=0.50: 76.908 2.628 11.579 510.821  
p=0.90: 194.745 2.221 40.750 930.698  
p=0.95: 253.426 2.702 36.130 1777.605

\$comparison

[1] 0.9999996

\$R2\_Naglekerke

[1] 0.999

\*\*\*\*\*

Cyt1Aa C190V Solubilized

\*\*\*\*\*

probit logit cloglog cauchit  
1 0.515224 0.5857071 0.4154309 0.9587459

\$Resum

Call:

glm(formula = x ~ log(d), family = family(i), data = status)

Deviance Residuals:

Min 1Q Median 3Q Max  
-0.38446 -0.12604 0.02591 0.22413 0.25695

Coefficients:

Estimate Std. Error z value Pr(>|z|)  
(Intercept) -17.683 10.840 -1.631 0.103  
log(d) 1.827 1.118 1.634 0.102

(Dispersion parameter for binomial family taken to be 1)

Null deviance: 5.99511 on 7 degrees of freedom  
Residual deviance: 0.41543 on 6 degrees of freedom  
AIC: 6.6854

Number of Fisher Scoring iterations: 8

\$ld.est

|           | LD       | SE    | LCL       | UCL      |
|-----------|----------|-------|-----------|----------|
| p = 0.50: | 13099.36 | 1.489 | 6005.352  | 28573.36 |
| p = 0.90: | 25275.32 | 1.603 | 10026.112 | 63717.82 |
| p = 0.95: | 29192.13 | 1.697 | 10350.440 | 82332.80 |

\$comparison

[1] 0.9987208

\$R2\_Naglekerke

[1] 0.931

\*\*\*\*\*

Cyt1Aa C190V Solubilized DTT

\*\*\*\*\*

|   | probit    | logit     | cloglog   | cauchit  |
|---|-----------|-----------|-----------|----------|
| 1 | 0.3162798 | 0.2958012 | 0.6600754 | 0.403564 |

\$Resum

Call:

glm(formula = x ~ log(d), family = family(i), data = status)

Deviance Residuals:

|  | Min      | 1Q       | Median   | 3Q      | Max     |
|--|----------|----------|----------|---------|---------|
|  | -0.38065 | -0.14868 | -0.00604 | 0.06943 | 0.20162 |

Coefficients:

|             | Estimate | Std. Error | z value | Pr(> z ) |
|-------------|----------|------------|---------|----------|
| (Intercept) | -18.169  | 14.801     | -1.228  | 0.220    |
| log(d)      | 2.963    | 2.391      | 1.239   | 0.215    |

(Dispersion parameter for binomial family taken to be 1)

Null deviance: 8.1874 on 7 degrees of freedom  
Residual deviance: 0.2958 on 6 degrees of freedom  
AIC: 5.5428

Number of Fisher Scoring iterations: 8

\$ld.est

|           | LD      | SE    | LCL     | UCL      |
|-----------|---------|-------|---------|----------|
| p = 0.50: | 460.722 | 1.625 | 177.837 | 1193.591 |

p = 0.90: 967.235 2.125 220.847 4236.152  
p = 0.95: 1244.706 2.506 205.608 7535.186

\$comparison  
[1] 0.9995172

\$R2\_Naglekerke  
[1] 0.964

\*\*\*\*\*  
Cyt1Aa C190V Activated  
\*\*\*\*\*

probit logit cloglog cauchit  
1 0.4967895 0.4434799 0.7994513 0.4662616

\$Resum

Call:  
glm(formula = x ~ log(d), family = family(i), data = status)

Deviance Residuals:  
Min 1Q Median 3Q Max  
-0.51831 -0.18746 0.00001 0.09990 0.20761

Coefficients:  
Estimate Std. Error z value Pr(>|z|)  
(Intercept) -9.840 8.687 -1.133 0.257  
log(d) 2.165 1.897 1.141 0.254

(Dispersion parameter for binomial family taken to be 1)

Null deviance: 6.97173 on 7 degrees of freedom  
Residual deviance: 0.44348 on 6 degrees of freedom  
AIC: 6.3819

Number of Fisher Scoring iterations: 7

\$ld.est  
LD SE LCL UCL  
p = 0.50: 94.225 1.778 30.500 291.088  
p = 0.90: 260.010 2.915 31.940 2116.634  
p = 0.95: 367.201 3.799 26.833 5024.940

\$comparison  
[1] 0.9984599

\$R2\_Naglekerke  
[1] 0.936

\*\*\*\*\*



Cyt1Aa C190V Activated DTT

\*\*\*\*\*

```
probit logit cloglog cauchit
1 0.307109 0.3047502 0.5363065 0.4984556
```

\$Resum

Call:  
glm(formula = x ~ log(d), family = family(i), data = status)

Deviance Residuals:  
Min 1Q Median 3Q Max  
-0.44611 -0.14211 0.00938 0.10477 0.16973

Coefficients:  
Estimate Std. Error z value Pr(>|z|)  
(Intercept) -9.913 8.040 -1.233 0.218  
log(d) 2.098 1.704 1.231 0.218

(Dispersion parameter for binomial family taken to be 1)

Null deviance: 7.02340 on 7 degrees of freedom  
Residual deviance: 0.30475 on 6 degrees of freedom  
AIC: 6.4747

Number of Fisher Scoring iterations: 7

\$ld.est  
LD SE LCL UCL  
p = 0.50: 112.815 1.820 34.900 364.677  
p = 0.90: 321.555 2.951 38.548 2682.331  
p = 0.95: 459.145 3.794 33.654 6264.109

\$comparison  
[1] 0.9994738

\$R2\_Naglekerke  
[1] 0.957

\*\*\*\*\*

Cyt1Aa D11N Activated

\*\*\*\*\*

```
probit logit cloglog cauchit
1 0.03329603 0.06486176 0.03974787 0.3964164
```

\$Resum

Call:  
glm(formula = x ~ log(d), family = family(i), data = status)

Deviance Residuals:

| Min       | 1Q        | Median   | 3Q       | Max      |
|-----------|-----------|----------|----------|----------|
| -0.100045 | -0.022087 | 0.007431 | 0.048828 | 0.108289 |

Coefficients:

|             | Estimate | Std. Error | z value | Pr(> z ) |
|-------------|----------|------------|---------|----------|
| (Intercept) | -6.777   | 5.543      | -1.223  | 0.221    |
| log(d)      | 1.454    | 1.135      | 1.280   | 0.200    |

(Dispersion parameter for binomial family taken to be 1)

Null deviance: 7.112716 on 7 degrees of freedom  
Residual deviance: 0.033296 on 6 degrees of freedom  
AIC: 6.2545

Number of Fisher Scoring iterations: 8

\$ld.est

|         | LD      | SE    | LCL    | UCL      |
|---------|---------|-------|--------|----------|
| p=0.50: | 105.890 | 1.675 | 38.514 | 291.134  |
| p=0.90: | 255.711 | 2.098 | 59.847 | 1092.576 |
| p=0.95: | 328.317 | 2.448 | 56.773 | 1898.640 |

\$comparison

[1]0.9999992

\$R2\_Naglekerke

[1]0.995

\*\*\*\*\*

Cyt1Aa Y171F Activated

\*\*\*\*\*

|  | probit | logit      | cloglog   | cauchit    |           |
|--|--------|------------|-----------|------------|-----------|
|  | 1      | 0.06029828 | 0.1100342 | 0.08884954 | 0.4867741 |

\$Resum

Call:

glm(formula = x ~ log(d), family = family(i), data = status)

Deviance Residuals:

| Min       | 1Q        | Median    | 3Q       | Max      |
|-----------|-----------|-----------|----------|----------|
| -0.075906 | -0.062219 | -0.007244 | 0.075850 | 0.183879 |

Coefficients:

|             | Estimate | Std. Error | z value | Pr(> z ) |
|-------------|----------|------------|---------|----------|
| (Intercept) | -5.5100  | 4.4370     | -1.242  | 0.214    |
| log(d)      | 1.1937   | 0.8775     | 1.360   | 0.174    |

(Dispersion parameter for binomial family taken to be 1)

Null deviance: 6.780142 on 7 degrees of freedom  
Residual deviance: 0.060298 on 6 degrees of freedom  
AIC: 5.9308

Number of Fisher Scoring iterations: 8

\$ld.est

|           | LD      | SE    | LCL    | UCL      |
|-----------|---------|-------|--------|----------|
| p = 0.50: | 101.097 | 1.906 | 28.571 | 357.724  |
| p = 0.90: | 295.812 | 2.170 | 64.800 | 1350.375 |
| p = 0.95: | 401.050 | 2.554 | 63.838 | 2519.501 |

\$comparison

[1] 0.9999955

\$R2\_Naglekerke

[1] 0.991

\*\*\*\*\*

Cyt1Aa E32Q Activated

\*\*\*\*\*

|   | probit    | logit    | cloglog   | cauchit   |
|---|-----------|----------|-----------|-----------|
| 1 | 0.1461402 | 0.177348 | 0.2361443 | 0.4487348 |

\$Resum

Call:

glm(formula = x ~ log(d), family = family(i), data = status)

Deviance Residuals:

|           |           |          |           |          |           |          |
|-----------|-----------|----------|-----------|----------|-----------|----------|
| 117       | 118       | 119      | 120       | 121      | 122       | 123      |
| -0.000001 | -0.295560 | 0.223260 | -0.045998 | 0.023806 | -0.078205 | 0.011880 |

Coefficients:

|             | Estimate | Std. Error | z value | Pr(> z ) |
|-------------|----------|------------|---------|----------|
| (Intercept) | -12.772  | 10.679     | -1.196  | 0.232    |
| log(d)      | 2.400    | 2.007      | 1.196   | 0.232    |

(Dispersion parameter for binomial family taken to be 1)

Null deviance: 4.77429 on 6 degrees of freedom  
Residual deviance: 0.14614 on 5 degrees of freedom  
AIC: 7.0578

Number of Fisher Scoring iterations: 8

\$ld.est

|  | LD | SE | LCL | UCL |
|--|----|----|-----|-----|
|--|----|----|-----|-----|

p = 0.50: 204.746 1.308 120.943 346.619  
p = 0.90: 349.245 1.696 124.015 983.530  
p = 0.95: 406.327 1.897 115.788 1425.890

\$comparison  
[1] 0.9995878

\$R2\_Naglekerke  
[1] 0.969

\*\*\*\*\*  
Cyt1Aa E45Q Activated  
\*\*\*\*\*

probit logit cloglog cauchit  
1 0.8462281 0.7179605 1.263394 0.3647874

\$Resum

Call:  
glm(formula = x ~ log(d), family = family(i), data = status)

Deviance Residuals:  
Min 1Q Median 3Q Max  
-0.35180 -0.17385 -0.08859 0.01740 0.10510

Coefficients:  
Estimate Std. Error z value Pr(>|z|)  
(Intercept) -278.46 628.07 -0.443 0.658  
log(d) 39.48 88.60 0.446 0.656

(Dispersion parameter for binomial family taken to be 1)

Null deviance: 14.17845 on 11 degrees of freedom  
Residual deviance: 0.36479 on 10 degrees of freedom  
AIC: 4.8107

Number of Fisher Scoring iterations: 12

\$ld.est  
LD SE LCL UCL  
p = 0.50: 1156.918 1.131 909.032 1472.400  
p = 0.90: 1250.719 1.145 958.940 1631.278  
p = 0.95: 1357.561 1.345 759.505 2426.545

\$comparison  
[1] 0.9999986

\$R2\_Naglekerke  
[1] 0.974

\*\*\*\*\*

Cyt1Aa D11N Solubilized DTT

\*\*\*\*\*

probit logit cloglog cauchit  
1 1.106634 0.7100102 0.4655829 0.3349157

\$Resum

Call:  
glm(formula = x ~ log(d), family = family(i), data = status)

Deviance Residuals:  
Min 1Q Median 3Q Max  
-0.23003 -0.06406 0.09788 0.19581 0.25164

Coefficients:  
Estimate Std. Error z value Pr(>|z|)  
(Intercept) -13.346 11.807 -1.130 0.258  
log(d) 2.080 1.852 1.123 0.261

(Dispersion parameter for binomial family taken to be 1)

Null deviance: 7.26574 on 12 degrees of freedom  
Residual deviance: 0.33492 on 11 degrees of freedom  
AIC: 10.217

Number of Fisher Scoring iterations: 7

\$ld.est  
LD SE LCL UCL  
p=0.50: 610.702 1.558 256.123 1456.165  
p=0.90: 2680.923 4.217 159.722 44999.141  
p=0.95: 12699.942 16.278 53.591 3009610.833

\$comparison  
[1] 0.9999998

\$R2\_Naglekerke  
[1] 0.954

\*\*\*\*\*

Cyt1Aa E32Q Solubilized DTT

\*\*\*\*\*

probit logit cloglog cauchit  
1 1.334224 0.9340985 0.7723857 0.1940535

\$Resum

Call:  
glm(formula = x ~ log(d), family = family(i), data = status)

Deviance Residuals:  
Min 1Q Median 3Q Max  
-0.07921 -0.03132 0.07095 0.15492 0.28159

Coefficients:  
Estimate Std. Error z value Pr(>|z|)  
(Intercept) -30.236 31.140 -0.971 0.332  
log(d) 3.683 3.766 0.978 0.328

(Dispersion parameter for binomial family taken to be 1)

Null deviance: 7.97730 on 10 degrees of freedom  
Residual deviance: 0.19405 on 9 degrees of freedom  
AIC: 6.8412

Number of Fisher Scoring iterations: 8

\$ld.est  
LD SE LCL UCL  
p=0.50: 3675.988 1.530 1596.549 8463.811  
p=0.90: 8477.885 2.482 1427.296 50357.125  
p=0.95: 20411.609 5.783 654.752 636323.316

\$comparison  
[1] 0.9999995

\$R2\_Naglekerke  
[1] 0.976

\*\*\*\*\*  
Cyt1Aa Y171F Solubilized DTT  
\*\*\*\*\*

probit logit cloglog cauchit  
1 1.307281 0.9309076 1.162064 0.1577064

\$Resum

Call:  
glm(formula = x ~ log(d), family = family(i), data = status)

Deviance Residuals:  
Min 1Q Median 3Q Max  
-0.13174 -0.09264 0.02837 0.10841 0.25586

Coefficients:

|             | Estimate | Std. Error | z value | Pr(> z ) |
|-------------|----------|------------|---------|----------|
| (Intercept) | -21.757  | 24.456     | -0.890  | 0.374    |
| log(d)      | 3.810    | 4.274      | 0.892   | 0.373    |

(Dispersion parameter for binomial family taken to be 1)

Null deviance: 6.73215 on 9 degrees of freedom  
Residual deviance: 0.15771 on 8 degrees of freedom  
AIC: 7.5873

Number of Fisher Scoring iterations: 8

\$ld.est

|         | LD       | SE    | LCL     | UCL       |
|---------|----------|-------|---------|-----------|
| p=0.50: | 301.887  | 1.373 | 162.073 | 562.316   |
| p=0.90: | 677.070  | 2.598 | 104.253 | 4397.244  |
| p=0.95: | 1582.977 | 6.553 | 39.747  | 63043.683 |

\$comparison

[1] 0.9999985

\$R2\_Naglekerke

[1] 0.977







Supplementary Table 4. List of all primers used for plasmid construction.

| Mutation | Name (Primer)   | Forward/<br>Reverse | Primer sequence (5'-3')                               | Length<br>(Primer) | Tm<br>(Primer) | Backbone | Notes |
|----------|-----------------|---------------------|-------------------------------------------------------|--------------------|----------------|----------|-------|
| /        | Amp_F1          | Forward             | GCCGCAGTGTTATCACTCATGGTTATGGC                         | 29                 | 64.0           | pWF45    |       |
| C7S      | Cyt1A-C7S_R1m   | Reverse             | tcttctaatgga <b>G</b> aatgatttaaatttccataataaacaactcc | 46                 | 60.0           | pWF45    |       |
| C190V    | Cyt1A-C190V_R1m | Reverse             | ctggtaca <b>AC</b> atacataacgccaccagtttg              | 46                 | 63.0           | pWF45    |       |
| D11N     | Cyt1A-D11N_R1m  | Reverse             | ccittataTttctaattggacaatgatttaaatttccat               | 46                 | 58.0           | pWF45    |       |
| E32Q     | Cyt1A-E32Q_R1m  | Reverse             | ggatcct <b>G</b> aacacgtaatgtaataaccctgc              | 46                 | 62.0           | pWF45    |       |
| E45Q     | Cyt1A-E45Q_R1m  | Reverse             | atcaatt <b>G</b> gttaatagaaagaagattattgatttcattgg     | 46                 | 59.0           | pWF45    |       |
| Q168E    | Cyt1A-Q168E_R1m | Reverse             | gtatgtgtaattgtt <b>C</b> attagcagtttcctg              | 46                 | 59.0           | pWF45    |       |
| Y171F    | Cyt1A-Y171F_R1m | Reverse             | gtatgtg <b>A</b> aattgtttgattagcagtttcctgc            | 46                 | 60.0           | pWF45    |       |
| /        | Amp_R1          | Reverse             | AGTGCTGCCATAACCATGAGTGATAACACT                        | 30                 | 63.0           | pWF45    |       |
| C7S      | Cyt1A-C7S_F1m   | Forward             | catt <b>C</b> tccattagaagatataaaggtaaatccatgg         | 46                 | 59.0           | pWF45    |       |
| C190V    | Cyt1A-C190V_F1m | Forward             | cgttatgtat <b>GT</b> tgtaccagttggtttgaaatt            | 46                 | 60.0           | pWF45    |       |
| D11N     | Cyt1A-D11N_F1m  | Forward             | cattgccattagaa <b>A</b> atataaaggtaaatccatgg          | 46                 | 59.0           | pWF45    |       |
| E32Q     | Cyt1A-E32Q_F1m  | Forward             | cattacgtgt <b>C</b> aggatccaaatgaaatcaataatc          | 46                 | 60.0           | pWF45    |       |
| E45Q     | Cyt1A-E45Q_F1m  | Forward             | ctattaac <b>C</b> aaatgataatccgaattatataattgcaagc     | 46                 | 59.0           | pWF45    |       |
| Q168E    | Cyt1A-Q168E_F1m | Forward             | ctgcta <b>G</b> aaacaaattacacatacaatgtcctg            | 46                 | 60.0           | pWF45    |       |
| Y171F    | Cyt1A-Y171F_F1m | Forward             | caaacaa <b>T</b> tacatacaatgtcctgttgc                 | 46                 | 60.0           | pWF45    |       |

Amp\_F1 was used with each reverse primer of Cyt1Aa mutant construction. For each mutation primer, the inserted mutation is indicated as a capital bold letter. To generate the vector containing the mutation, the two fragments generated for the same mutations were assembled by Gibson assembly following the procedure described in the manuscript.

Amp\_R1 was used with each forward primer of Cyt1Aa mutant construction. For each mutation primer, the inserted mutation is indicated as a capital bold letter. To generate the vector containing the mutation, the two fragments generated for the same mutations were assembled by Gibson assembly following the procedure described in the manuscript.
