# Supplementary material for: Serial femtosecond crystallography on in vivo-grown crystals drives elucidation of mosquitocidal Cyt1Aa bioactivation cascade
Source: PubMed Central journal article supplement (PMC7052140; doi:10.1038/s41467-020-14894-w), 2020-03-02
Supplement: 41467_2020_14894_MOESM3_ESM.pdf [file 41467_2020_14894_MOESM3_ESM.pdf]

## Description of Additional Supplementary Files

File Name: Supplementary Movie 1

Description: Sf21 cell exposed to 1.4 nm FITC-Dextran only (control).

File Name: Supplementary Movie 2

Description: Sf21 cell exposed simultaneously to 1.4 nm FITC-Dextran and to 400 nM of Cyt1Aa activated toxin.

File Name: Supplementary Movie 3

Description: NIH cell exposed to 1.4 nm FITC-Dextran only (control).

File Name: Supplementary Movie 4

Description: NIH cell exposed simultaneously to 1.4 nm FITC-Dextran and to 400 nM of Cyt1Aa activated toxin.
